# Supplementary material for: Terrestrial Biodiversity Impacts of Replacing Beef with Novel Burger Patties across Ten European Union Countries
Source: Research Square preprint supplement (doi:10.21203/rs.3.rs-8056294/v1), 2026-01-08
Supplement: Supplementary file 6 [file CF EXIOBASE GLAM NB.xlsx]

## Sheet: CF_LU_GLAM
region	permanent crop	pasture	forest, intensive	forest, extensive	urban
AT	2.8324e-15	1.9537e-15	6.9158e-16	8.6236e-16	2.308e-15
BE	9.7718e-16	6.9505e-16	6.0203e-16	3.0966e-16	7.9394e-16
BG	1.6058e-15	1.1403e-15	2.4068e-16	4.7361e-16	1.3785e-15
CY	1.2904e-14	4.5094e-15	6.984e-15	3.3697e-15	1.5505e-14
CZ	9.6435e-16	6.7709e-16	5.9056e-16	3.0146e-16	7.8375e-16
DE	9.4681e-16	6.6671e-16	6.0517e-16	3.0198e-16	7.6143e-16
DK	4.3106e-16	3.1152e-16	5.6545e-16	1.3317e-16	3.5794e-16
EE	3.215e-16	2.4724e-16	1.8648e-16	8.5693e-17	2.9435e-16
ES	5.9777e-15	5.3053e-15	3.7203e-15	2.4445e-15	6.6491e-15
FI	2.5795e-16	2.4724e-16	1.3638e-16	5.4155e-17	2.448e-16
FR	2.6025e-15	2.188e-15	1.2738e-15	7.9857e-16	1.6747e-15
GR	5.7854e-15	4.3738e-15	3.3646e-15	1.631e-15	3.708e-15
HR	2.4443e-15	1.7675e-15	7.3384e-16	6.844e-16	2.1118e-15
HU	1.2524e-15	8.8125e-16	7.3384e-16	3.4505e-16	1.0893e-15
IE	5.5285e-16	4.1098e-16	3.7913e-16	1.7356e-16	5.0946e-16
IT	5.0236e-15	4.0681e-15	4.82e-15	1.4908e-15	4.2789e-15
LT	3.6196e-16	2.7154e-16	2.1071e-16	9.7745e-17	3.2666e-16
LU	1.1388e-15	7.9528e-16	7.0822e-16	3.7194e-16	8.9828e-16
LV	3.215e-16	2.4724e-16	1.8648e-16	8.5693e-17	2.9435e-16
MT	9.5835e-15	7.1284e-15	5.5161e-15	2.6897e-15	8.2241e-15
NL	3.1708e-15	2.8323e-15	6.4194e-16	5.7092e-16	8.7231e-16
PL	4.6219e-16	3.3253e-16	2.7095e-16	1.3147e-16	4.0119e-16
PT	6.8184e-15	4.7302e-15	4.2662e-15	2.2542e-15	5.3858e-15
RO	9.6606e-16	6.9049e-16	4.886e-16	2.6949e-16	8.4479e-16
SE	4.1146e-16	2.434e-16	2.3216e-16	1.0292e-16	2.5905e-16
SI	2.3183e-15	1.634e-15	7.3384e-16	6.742e-16	1.9591e-15
SK	1.1396e-15	7.9995e-16	7.3384e-16	3.247e-16	9.7736e-16
GB	7.0438e-16	5.9001e-16	4.4174e-16	2.1579e-16	5.9605e-16
US	1.8647e-15	1.5321e-15	9.493e-16	4.644e-16	1.7836e-15
JP	9.1597e-15	8.7404e-15	1.5418e-15	1.6499e-15	8.3916e-15
CN	2.6168e-15	2.2319e-15	1.5477e-15	8.5918e-16	3.1617e-15
CA	4.6084e-16	2.244e-16	1.8013e-16	8.9293e-17	5.4007e-16
KR	3.7835e-15	9.7897e-16	5.1628e-16	1.0553e-15	3.2365e-15
BR	6.8928e-15	5.706e-15	4.1518e-15	2.9623e-15	6.3485e-15
IN	2.9138e-15	2.6212e-15	1.0622e-15	4.8197e-16	2.9116e-15
MX	1.4189e-14	1.0316e-14	9.1217e-15	4.0664e-15	8.5695e-15
RU	2.7041e-16	3.8593e-16	1.1491e-16	5.827e-17	2.5787e-16
AU	9.1462e-15	4.323e-15	7.3638e-15	3.0636e-15	1.4137e-14
CH	2.8039e-15	1.9334e-15	7.0822e-16	8.6656e-16	2.2643e-15
TR	2.768e-15	2.286e-15	2.6303e-15	7.0108e-16	3.2007e-15
TW	0	0	0	0	0
NO	1.0621e-15	2.4756e-16	6.0621e-16	2.8931e-16	3.6126e-16
ID	2.099e-14	1.2877e-14	4.5581e-15	7.6678e-15	8.7138e-15
ZA	6.5138e-15	4.9749e-15	5.2054e-15	2.0378e-15	7.1858e-15
WA	9.2581e-15	7.2901e-15	4.8325e-15	2.1813e-15	2.0969e-14
WL	9.2581e-15	7.2901e-15	4.8325e-15	2.1813e-15	2.0969e-14
WE	9.2581e-15	7.2901e-15	4.8325e-15	2.1813e-15	2.0969e-14
WF	9.2581e-15	7.2901e-15	4.8325e-15	2.1813e-15	2.0969e-14
WM	9.2581e-15	7.2901e-15	4.8325e-15	2.1813e-15	2.0969e-14

## Sheet: landtype
EXIOBASE_product_name	landuse_type
Cropland - Cereal grains nec	permanent crop
Cropland - Paddy rice	permanent crop
Cropland - Sugar cane, sugar beet	permanent crop
Cropland - Wheat	permanent crop
Permanent pastures - Grazing-Cattle	pasture
Permanent pastures - Grazing-Meat animals nec	pasture
Permanent pastures - Grazing-Raw milk	pasture
Cropland - Crops nec	permanent crop
Cropland - Fodder crops-Pigs	permanent crop
Cropland - Fodder crops-Cattle	permanent crop
Cropland - Fodder crops-Meat animals nec	permanent crop
Cropland - Fodder crops-Poultry	permanent crop
Cropland - Fodder crops-Raw milk	permanent crop
Cropland - Oil seeds	permanent crop
Cropland - Plant-based fibers	permanent crop
Cropland - Vegetables, fruit, nuts	permanent crop
Forest area - Forestry	forest, intensive
Other land Use: Total	forest, intensive
Forest area - Marginal use	forest, extensive
Infrastructure land	urban
