# Supplementary material for: Terrestrial Biodiversity Impacts of Replacing Beef with Novel Burger Patties across Ten European Union Countries
Source: Research Square preprint supplement (doi:10.21203/rs.3.rs-8056294/v1), 2026-01-08
Supplement: Supplementary file 11 [file CF FEBEXIO GLAM.xlsx]

## Sheet: CF LU GLAM F
area	permanent crop	pasture	forest, intensive	forest, extensive	urban
Armenia	4.5947e-15	3.8824e-15	2.2756e-15	9.3987e-16	4.4803e-15
Afghanistan	4.5011e-16	3.983e-16	1.7941e-16	9.8561e-17	5.0069e-16
Albania	4.5821e-15	3.2649e-15	2.7382e-15	1.3941e-15	3.1924e-15
Algeria	4.3453e-16	2.004e-15	1.097e-15	4.7653e-16	4.1732e-16
Angola	2.8268e-15	2.3325e-15	1.5139e-15	7.1798e-16	4.0073e-15
Antigua and Barbuda	1.6249e-13	1.5856e-13	5.1148e-14	1.6835e-14	2.7064e-13
Argentina	2.7751e-15	2.1491e-15	2.1574e-15	8.3741e-16	1.9693e-15
Australia	9.1462e-15	4.323e-15	7.3638e-15	3.0636e-15	1.4137e-14
Austria	2.8324e-15	1.9537e-15	6.9158e-16	8.6236e-16	2.308e-15
Bahamas	2.2863e-14	2.166e-14	1.5713e-14	5.3299e-15	3.628e-14
Bahrain	3.5088e-16	3.3769e-16	2.2213e-16	8.9093e-17	3.5946e-16
Barbados	1.6249e-13	1.5856e-13	6.0396e-14	1.8656e-14	2.7591e-13
Belgium-Luxembourg	0	0	0	0	0
Bangladesh	2.0764e-15	1.6326e-15	4.2214e-15	3.6474e-16	2.1028e-15
Bolivia (Plurinational State of)	4.8848e-15	4.4701e-15	3.0939e-15	1.6981e-15	4.947e-15
Botswana	2.8834e-15	1.6613e-15	1.241e-15	6.3232e-16	1.9512e-15
Brazil	6.8928e-15	5.706e-15	4.1518e-15	2.9623e-15	6.3485e-15
Belize	2.6852e-14	2.0971e-14	1.5928e-14	8.014e-15	1.6502e-14
Solomon Islands	1.1988e-13	6.7176e-14	6.5247e-13	1.9075e-13	1.1594e-13
Brunei Darussalam	1.5274e-14	1.1743e-14	6.8633e-15	3.3703e-15	1.2065e-14
Bulgaria	1.6058e-15	1.1403e-15	2.4068e-16	4.7361e-16	1.3785e-15
Myanmar	1.0175e-14	1.1351e-14	4.6165e-15	1.7824e-15	9.7917e-15
Burundi	9.7781e-15	8.2954e-15	5.0949e-15	2.3707e-15	8.7022e-15
Cameroon	1.8494e-14	8.5192e-15	4.5769e-15	2.6555e-15	4.7515e-15
Canada	4.6084e-16	2.244e-16	1.8013e-16	8.9293e-17	5.4007e-16
Cabo Verde	1.2692e-13	1.098e-13	4.1089e-15	1.6583e-15	1.1447e-14
Central African Republic	1.3531e-15	2.7994e-15	1.8873e-15	9.147e-16	4.353e-15
Sri Lanka	2.0944e-14	1.0674e-14	9.5533e-15	3.2558e-15	2.0842e-14
Chad	4.7917e-16	4.2358e-16	3.6348e-16	1.635e-16	3.3122e-16
Chile	5.1267e-15	3.4788e-15	2.9052e-15	7.961e-16	5.3715e-15
China, mainland	2.6168e-15	2.2319e-15	1.5477e-15	8.5918e-16	3.1617e-15
Colombia	2.8172e-14	1.7121e-14	8.3579e-15	5.6068e-15	3.5112e-14
Congo	6.2472e-15	4.4604e-15	3.1985e-15	1.6233e-15	5.1286e-15
Costa Rica	7.5715e-14	5.6236e-14	2.8035e-14	2.5677e-14	3.4988e-14
Cuba	1.8971e-14	1.7974e-14	8.1671e-15	2.91e-15	1.9041e-14
Cyprus	1.2904e-14	4.5094e-15	6.984e-15	3.3697e-15	1.5505e-14
Czechoslovakia	0	0	0	0	0
Azerbaijan	2.6304e-15	2.1726e-15	1.3917e-15	6.1532e-16	2.4436e-15
Benin	2.3422e-15	1.8992e-15	1.3023e-15	6.4053e-16	2.0159e-15
Denmark	4.3106e-16	3.1152e-16	5.6545e-16	1.3317e-16	3.5794e-16
Dominica	1.6249e-13	1.8769e-13	8.0964e-14	2.3314e-14	3.4809e-13
Dominican Republic	3.6579e-14	3.4211e-14	8.9102e-15	5.2263e-15	3.4759e-14
Belarus	3.902e-16	2.8851e-16	2.2763e-16	1.0616e-16	3.4922e-16
Ecuador	5.0579e-14	3.0956e-14	7.0202e-15	1.0359e-14	4.2357e-14
Egypt	3.5228e-16	3.3026e-16	6.1743e-16	2.6606e-16	2.7531e-16
El Salvador	3.1344e-14	2.5836e-14	2.1912e-14	7.194e-15	2.592e-14
Estonia	3.215e-16	2.4724e-16	1.8648e-16	8.5693e-17	2.9435e-16
Fiji	6.3579e-14	6.1457e-14	2.5873e-14	9.2643e-15	1.0454e-13
Finland	2.5795e-16	2.4724e-16	1.3638e-16	5.4155e-17	2.448e-16
France	2.6025e-15	2.188e-15	1.2738e-15	7.9857e-16	1.6747e-15
French Polynesia	0	0	0	0	0
Djibouti	1.1086e-15	1.0585e-15	4.0498e-16	1.5924e-16	1.6953e-15
Georgia	4.3092e-15	3.6083e-15	2.187e-15	9.312e-16	4.1288e-15
Gabon	1.4523e-14	9.0638e-15	6.424e-15	3.2513e-15	5.4967e-15
Gambia	2.9716e-15	2.4e-15	1.6416e-15	8.0321e-16	2.5634e-15
Germany	9.4681e-16	6.6671e-16	6.0517e-16	3.0198e-16	7.6143e-16
Bosnia and Herzegovina	2.308e-15	1.6489e-15	7.3384e-16	6.6706e-16	1.9768e-15
Ghana	6.4539e-15	5.2346e-15	3.5075e-15	1.7222e-15	5.4856e-15
Kiribati	8.3681e-16	4.952e-16	7.8908e-16	3.27e-16	1.2813e-15
Greece	5.7854e-15	4.3738e-15	3.3646e-15	1.631e-15	3.708e-15
Grenada	1.0945e-13	1.8008e-13	8.9102e-15	1.9081e-14	2.1677e-14
Guatemala	3.7597e-14	2.9621e-14	2.3861e-14	1.0931e-14	3.2746e-14
Guinea	5.2187e-15	4.2359e-15	2.8343e-15	1.3843e-15	4.1822e-15
Guyana	4.1407e-15	5.2925e-15	3.7711e-15	2.2495e-15	6.7245e-15
Haiti	3.6375e-14	3.4118e-14	8.9102e-15	5.1093e-15	3.4666e-14
Honduras	5.6195e-14	4.1111e-14	5.1913e-14	2.1906e-14	2.9231e-14
China, Hong Kong SAR	2.6168e-15	2.2319e-15	1.5477e-15	8.5918e-16	3.1617e-15
Hungary	1.2524e-15	8.8125e-16	7.3384e-16	3.4505e-16	1.0893e-15
Croatia	2.4443e-15	1.7675e-15	7.3384e-16	6.844e-16	2.1118e-15
Iceland	7.3556e-17	5.5404e-17	1.7659e-15	5.1107e-16	9.1155e-17
India	2.9138e-15	2.6212e-15	1.0622e-15	4.8197e-16	2.9116e-15
Indonesia	2.099e-14	1.2877e-14	4.5581e-15	7.6678e-15	8.7138e-15
Iran (Islamic Republic of)	1.0176e-15	9.1761e-16	5.8575e-16	1.9036e-16	8.2645e-16
Iraq	2.5304e-15	2.41e-15	6.8639e-16	2.7116e-16	2.0803e-15
Ireland	5.5285e-16	4.1098e-16	3.7913e-16	1.7356e-16	5.0946e-16
Israel	4.4904e-15	3.9702e-15	3.2148e-15	1.4933e-15	3.8862e-15
Italy	5.0236e-15	4.0681e-15	4.82e-15	1.4908e-15	4.2789e-15
Côte d'Ivoire	7.5458e-15	6.1486e-15	4.068e-15	1.988e-15	6.4244e-15
Kazakhstan	3.4512e-16	2.8723e-16	2.2853e-16	7.6106e-17	3.3805e-16
Jamaica	8.6319e-14	7.4435e-14	8.9102e-15	1.6585e-14	7.4242e-14
Japan	9.1597e-15	8.7404e-15	1.5418e-15	1.6499e-15	8.3916e-15
Jordan	3.2715e-15	3.0025e-15	3.2203e-15	1.4968e-15	2.7503e-15
Kyrgyzstan	8.8757e-16	7.488e-16	5.9978e-16	1.8915e-16	9.0332e-16
Kenya	6.99e-15	4.9464e-15	3.8415e-15	1.8948e-15	6.8987e-15
Cambodia	5.7974e-15	5.7402e-15	2.8869e-15	1.0706e-15	5.7598e-15
Democratic People's Republic of Korea	1.8872e-15	1.2797e-15	5.1604e-16	4.8125e-16	1.6634e-15
Republic of Korea	3.7835e-15	9.7897e-16	5.1628e-16	1.0553e-15	3.2365e-15
Kuwait	3.4506e-15	3.3003e-15	3.9078e-16	1.8469e-16	2.7515e-15
Latvia	3.215e-16	2.4724e-16	1.8648e-16	8.5693e-17	2.9435e-16
Lao People's Democratic Republic	1.3339e-14	1.1559e-14	6.1298e-15	2.3667e-15	1.1061e-14
Lebanon	5.5266e-15	4.6237e-15	2.9654e-15	1.334e-15	5.1362e-15
Lesotho	7.6208e-15	6.097e-15	5.5836e-15	2.7035e-15	2.858e-15
Liberia	1.133e-14	9.2906e-15	6.0147e-15	2.9128e-15	9.6991e-15
Libya	1.8115e-16	2.0154e-16	8.2199e-16	3.5332e-16	1.8197e-16
Lithuania	3.6196e-16	2.7154e-16	2.1071e-16	9.7745e-17	3.2666e-16
China, Macao SAR	2.6168e-15	2.2319e-15	1.5477e-15	8.5918e-16	3.1617e-15
Madagascar	6.3013e-14	5.0035e-14	2.744e-14	1.7414e-14	4.2069e-14
Malawi	8.1499e-15	5.5372e-15	4.4783e-15	2.1533e-15	4.8968e-15
Malaysia	2.7215e-14	1.1559e-14	6.904e-15	5.912e-15	1.341e-14
Maldives	6.9773e-16	3.9089e-16	7.1526e-16	3.5312e-16	1.1829e-15
Mali	6.8074e-16	8.5149e-16	6.1561e-16	2.928e-16	7.4431e-16
Malta	9.5835e-15	7.1284e-15	5.5161e-15	2.6897e-15	8.2241e-15
Mauritania	2.8663e-16	5.5804e-16	2.4023e-16	1.005e-16	2.9945e-16
Mauritius	4.0448e-14	6.3398e-14	2.2202e-14	7.7088e-15	7.0641e-14
Mexico	1.4189e-14	1.0316e-14	9.1217e-15	4.0664e-15	8.5695e-15
Mongolia	5.082e-16	4.5937e-16	1.1207e-16	5.0166e-17	2.7102e-16
Morocco	2.0801e-15	1.7635e-15	1.3432e-15	5.6652e-16	2.0754e-15
Mozambique	7.9418e-15	6.1887e-15	4.6004e-15	2.3141e-15	6.4873e-15
Republic of Moldova	4.5704e-16	3.4282e-16	2.6115e-16	1.1943e-16	4.1532e-16
Namibia	1.9168e-15	1.5907e-15	9.5802e-16	4.6566e-16	1.0018e-15
Nepal	4.5257e-15	4.5451e-15	2.0497e-15	8.4417e-16	5.0335e-15
Netherlands	3.1708e-15	2.8323e-15	6.4194e-16	5.7092e-16	8.7231e-16
Netherlands Antilles	0	0	0	0	0
New Caledonia	0	0	0	0	0
North Macedonia	2.3503e-15	1.7034e-15	1.3893e-15	6.8044e-16	1.6954e-15
Vanuatu	5.0739e-13	2.822e-13	1.0506e-13	3.8322e-14	3.9221e-14
New Zealand	7.0324e-15	6.0895e-15	3.8159e-15	1.6128e-15	6.3154e-15
Nicaragua	6.1745e-14	4.2766e-14	6.5751e-14	2.7285e-14	2.0206e-14
Niger	4.0835e-16	7.9748e-16	3.9046e-16	1.7762e-16	4.4039e-16
Nigeria	4.19e-15	3.4298e-15	2.1788e-15	1.1514e-15	2.8822e-15
Norway	1.0621e-15	2.4756e-16	6.0621e-16	2.8931e-16	3.6126e-16
Pakistan	5.7686e-16	5.7097e-16	1.7344e-16	1.2875e-16	5.4917e-16
Panama	6.7518e-14	5.1203e-14	2.3022e-14	2.6017e-14	1.6502e-14
Czech Republic	9.6435e-16	6.7709e-16	5.9056e-16	3.0146e-16	7.8375e-16
Papua New Guinea	1.1443e-14	1.5011e-14	3.6072e-14	1.558e-14	1.657e-13
Paraguay	3.9772e-15	3.158e-15	2.0248e-15	9.533e-16	3.5817e-15
Peru	1.2222e-14	8.0153e-15	6.7085e-15	3.235e-15	3.2857e-15
Philippines	2.1685e-14	1.8169e-14	6.305e-15	3.2733e-15	1.7559e-14
Poland	4.6219e-16	3.3253e-16	2.7095e-16	1.3147e-16	4.0119e-16
Portugal	6.8184e-15	4.7302e-15	4.2662e-15	2.2542e-15	5.3858e-15
Guinea-Bissau	5.0675e-15	4.0691e-15	2.7864e-15	1.3623e-15	4.3619e-15
Timor-Leste	5.6547e-15	5.8147e-15	2.3324e-15	7.2279e-16	5.7127e-15
Puerto Rico	0	0	0	0	0
Eritrea	1.4075e-15	1.2807e-15	6.4289e-16	3.3575e-16	9.695e-16
Qatar	3.4506e-15	3.3003e-15	1.8076e-15	9.8783e-16	2.7515e-15
Zimbabwe	5.6028e-15	4.3149e-15	3.2173e-15	1.6336e-15	4.5755e-15
Romania	9.6606e-16	6.9049e-16	4.886e-16	2.6949e-16	8.4479e-16
Rwanda	1.2863e-14	1.1303e-14	6.706e-15	3.1832e-15	1.1385e-14
Russian Federation	2.7041e-16	3.8593e-16	1.1491e-16	5.827e-17	2.5787e-16
Serbia and Montenegro	0	0	0	0	0
Saint Kitts and Nevis	3.3491e-14	3.2081e-14	8.9102e-15	4.1692e-15	2.1677e-14
Saint Lucia	1.6249e-13	1.9283e-13	5.7833e-14	1.7249e-14	2.4154e-13
Saint Vincent and the Grenadines	6.2795e-14	1.2776e-13	8.9102e-15	1.5308e-14	2.1677e-14
Sao Tome and Principe	2.4061e-13	2.1031e-14	3.0856e-14	8.6926e-15	3.5894e-14
Saudi Arabia	3.2257e-15	3.0837e-15	2.9013e-15	1.5208e-15	2.583e-15
Senegal	1.9079e-15	1.5611e-15	1.0537e-15	5.1345e-16	1.657e-15
Sierra Leone	9.1141e-15	7.4463e-15	4.867e-15	2.3598e-15	7.8252e-15
Slovenia	2.3183e-15	1.634e-15	7.3384e-16	6.742e-16	1.9591e-15
Slovakia	1.1396e-15	7.9995e-16	7.3384e-16	3.247e-16	9.7736e-16
Singapore	1.6704e-14	1.4961e-13	7.6224e-15	3.1222e-15	1.5562e-14
Somalia	3.1607e-15	2.7007e-15	1.6758e-15	7.528e-16	9.8771e-15
South Africa	6.5138e-15	4.9749e-15	5.2054e-15	2.0378e-15	7.1858e-15
Spain	5.9777e-15	5.3053e-15	3.7203e-15	2.4445e-15	6.6491e-15
Suriname	4.3486e-15	3.396e-15	2.5347e-15	1.415e-15	9.8923e-15
Tajikistan	1.3277e-15	8.3431e-16	1.3949e-15	2.4838e-16	1.3027e-15
Eswatini	9.6496e-15	7.4276e-15	5.5769e-15	2.8482e-15	7.3586e-15
Sweden	4.1146e-16	2.434e-16	2.3216e-16	1.0292e-16	2.5905e-16
Switzerland	2.8039e-15	1.9334e-15	7.0822e-16	8.6656e-16	2.2643e-15
Syrian Arab Republic	2.5971e-15	2.1958e-15	3.1527e-15	1.4536e-15	2.4221e-15
Turkmenistan	4.8888e-16	4.6047e-16	6.0541e-16	2.0078e-16	4.8232e-16
China, Taiwan Province of	0	0	0	0	0
United Republic of Tanzania	1.0676e-14	8.6396e-15	5.9598e-15	2.8992e-15	7.0111e-15
Thailand	7.8947e-15	6.2499e-15	3.8619e-15	1.5004e-15	6.7637e-15
Togo	3.8442e-15	3.1183e-15	2.1101e-15	1.037e-15	3.2861e-15
Trinidad and Tobago	2.0304e-14	1.0079e-14	7.0925e-15	2.9203e-15	1.0516e-14
Oman	2.5489e-15	2.2413e-15	2.5407e-15	1.2347e-15	2.0808e-15
Tunisia	1.7319e-15	1.4566e-15	1.4606e-15	6.2684e-16	1.6662e-15
Turkey	2.768e-15	2.286e-15	2.6303e-15	7.0108e-16	3.2007e-15
United Arab Emirates	2.9992e-15	2.87e-15	2.6456e-15	1.4337e-15	2.4159e-15
Uganda	6.1221e-15	5.1871e-15	3.3083e-15	1.6251e-15	6.8482e-15
USSR	0	0	0	0	0
United Kingdom	7.0438e-16	5.9001e-16	4.4174e-16	2.1579e-16	5.9605e-16
Ukraine	5.4867e-16	4.1611e-16	2.7983e-16	1.4163e-16	4.9771e-16
United States of America	1.8647e-15	1.5321e-15	9.493e-16	4.644e-16	1.7836e-15
Burkina Faso	1.6676e-15	1.3643e-15	9.2522e-16	4.5141e-16	1.4488e-15
Uruguay	3.6876e-15	2.9218e-15	1.8886e-15	8.8632e-16	3.1158e-15
Uzbekistan	4.6831e-16	4.315e-16	8.7724e-16	2.4838e-16	4.5811e-16
Venezuela (Bolivarian Republic of)	8.8366e-15	8.608e-15	6.8291e-15	7.87e-15	2.5014e-14
Viet Nam	1.2627e-14	9.9869e-15	6.4721e-15	2.302e-15	1.0025e-14
Ethiopia	2.9506e-15	2.642e-15	1.2491e-15	6.3153e-16	4.3471e-15
Samoa	1.614e-14	9.2328e-15	1.3736e-14	4.35e-15	1.7776e-14
Yugoslav SFR	0	0	0	0	0
Yemen	1.4398e-15	1.3641e-15	2.1921e-15	9.9246e-16	1.246e-15
Democratic Republic of the Congo	7.0766e-15	3.9685e-15	2.3524e-15	1.0795e-15	5.9533e-15
Zambia	5.4621e-15	4.09e-15	2.8599e-15	1.4081e-15	4.6258e-15
Belgium	9.7718e-16	6.9505e-16	6.0203e-16	3.0966e-16	7.9394e-16
Luxembourg	1.1388e-15	7.9528e-16	7.0822e-16	3.7194e-16	8.9828e-16
Serbia	1.5075e-15	1.0789e-15	7.3384e-16	4.1505e-16	1.3305e-15
Montenegro	3.0611e-15	2.2085e-15	1.7905e-15	8.7971e-16	2.6255e-15
Sudan	3.8219e-16	3.5289e-16	2.8132e-16	1.2161e-16	3.8093e-16
South Sudan	1.97e-15	1.8975e-15	1.2881e-15	6.2464e-16	3.6607e-15
RoW	9.2581e-15	7.2901e-15	4.8325e-15	2.1813e-15	2.0969e-14

## Sheet: landtype
EXIOBASE_product_name	landuse_type
Cropland - Cereal grains nec	permanent crop
Cropland - Paddy rice	permanent crop
Cropland - Sugar cane, sugar beet	permanent crop
Cropland - Wheat	permanent crop
Other land - Grazing-Cattle	pasture
Other land - Grazing-Meat animals nec	pasture
Other land - Grazing-Raw milk	pasture
Cropland - Crops nec	permanent crop
Cropland - Fodder crops-Pigs	permanent crop
Cropland - Fodder crops-Cattle	permanent crop
Cropland - Fodder crops-Meat animals nec	permanent crop
Cropland - Fodder crops-Poultry	permanent crop
Cropland - Fodder crops-Raw milk	permanent crop
Cropland - Oil seeds	permanent crop
Cropland - Plant-based fibers	permanent crop
Cropland - Vegetables, fruit, nuts	permanent crop
Other land - Wood fuel	forest, intensive
Other land - Grazing	pasture
Other land - Marginal use	forest, extensive
Infrastructure land	urban
