# Supplementary material for: Terrestrial Biodiversity Impacts of Replacing Beef with Novel Burger Patties across Ten European Union Countries
Source: Research Square preprint supplement (doi:10.21203/rs.3.rs-8056294/v1), 2026-01-08
Supplement: Supplementary file 31 [file 9ce5aa549597c5ffd8e7e480.xlsx]

## Sheet: CoverSheet
Journal of Industrial Ecology – www.wileyonlinelibrary.com/journal/jie
SUPPORTING INFORMATION FOR:
Zhang, Y., Rasul, K., Dorber, M., Stadler, K., Hertwich, E. G., Verones, F. Terrestrial Biodiversity Impacts of Replacing Beef with Novel Burger Patties across Ten European Union Countries. Journal of Industrial Ecology.
This supporting information provides the MRIO models (FABIO and FABEXIO) linked to the LCAI method of GLAM for assessing land-driven and climate-driven biodiversity impacts.
The file contains the following information:
Table:	Description:
Table S2-1	Characterization factors for climate change (GLAM)
Table S2-2	Characterization factors for land use (GLAM)
Table S2-3	Climate change CFs from GLAM (LCIA) linked to FABEXIO (MRIO)
Table S2-4	Land use CFs from GLAM (LCIA) linked to FABEXIO (MRIO)
Table S2-5	Land use CFs from GLAM (LCIA) linked to FABIO (MRIO)

## Sheet: S2-1
	Terrestrial	Freshwater	Marine
Global characterization factors (Global PDF*y/kg)
carbon dioxide (biogenic)	4.816e-17	2.16e-15	1.178e-16
carbon dioxide (fossil)	4.816e-17	2.16e-15	1.178e-16
Carbon dioxide (land use change)	4.816e-17	2.16e-15	1.178e-16
methane (biogenic)	1.8955e-15	6.04e-14	3.9038e-15
methane (fossil)	1.8955e-15	6.04e-14	3.9038e-15
nitrous oxide	1.3688e-14	5.71e-13	3.3824e-14
sulphur hexafluoride	2.3355e-13	5.07e-11	5.5191e-13

## Sheet: S2-2
region	permanent crop	pasture	forest, intensive	forest, extensive	urban
Armenia	4.5947e-15	3.8824e-15	2.2756e-15	9.3987e-16	4.4803e-15
Afghanistan	4.5011e-16	3.983e-16	1.7941e-16	9.8561e-17	5.0069e-16
Albania	4.5821e-15	3.2649e-15	2.7382e-15	1.3941e-15	3.1924e-15
Algeria	4.3453e-16	2.004e-15	1.097e-15	4.7653e-16	4.1732e-16
Angola	2.8268e-15	2.3325e-15	1.5139e-15	7.1798e-16	4.0073e-15
Antigua and Barbuda	1.6249e-13	1.5856e-13	5.1148e-14	1.6835e-14	2.7064e-13
Argentina	2.7751e-15	2.1491e-15	2.1574e-15	8.3741e-16	1.9693e-15
Australia	9.1462e-15	4.323e-15	7.3638e-15	3.0636e-15	1.4137e-14
Austria	2.8324e-15	1.9537e-15	6.9158e-16	8.6236e-16	2.308e-15
Bahamas	2.2863e-14	2.166e-14	1.5713e-14	5.3299e-15	3.628e-14
Bahrain	3.5088e-16	3.3769e-16	2.2213e-16	8.9093e-17	3.5946e-16
Barbados	1.6249e-13	1.5856e-13	6.0396e-14	1.8656e-14	2.7591e-13
Belgium-Luxembourg	0	0	0	0	0
Bangladesh	2.0764e-15	1.6326e-15	4.2214e-15	3.6474e-16	2.1028e-15
Bolivia (Plurinational State of)	4.8848e-15	4.4701e-15	3.0939e-15	1.6981e-15	4.947e-15
Botswana	2.8834e-15	1.6613e-15	1.241e-15	6.3232e-16	1.9512e-15
Brazil	6.8928e-15	5.706e-15	4.1518e-15	2.9623e-15	6.3485e-15
Belize	2.6852e-14	2.0971e-14	1.5928e-14	8.014e-15	1.6502e-14
Solomon Islands	1.1988e-13	6.7176e-14	6.5247e-13	1.9075e-13	1.1594e-13
Brunei Darussalam	1.5274e-14	1.1743e-14	6.8633e-15	3.3703e-15	1.2065e-14
Bulgaria	1.6058e-15	1.1403e-15	2.4068e-16	4.7361e-16	1.3785e-15
Myanmar	1.0175e-14	1.1351e-14	4.6165e-15	1.7824e-15	9.7917e-15
Burundi	9.7781e-15	8.2954e-15	5.0949e-15	2.3707e-15	8.7022e-15
Cameroon	1.8494e-14	8.5192e-15	4.5769e-15	2.6555e-15	4.7515e-15
Canada	4.6084e-16	2.244e-16	1.8013e-16	8.9293e-17	5.4007e-16
Cabo Verde	1.2692e-13	1.098e-13	4.1089e-15	1.6583e-15	1.1447e-14
Central African Republic	1.3531e-15	2.7994e-15	1.8873e-15	9.147e-16	4.353e-15
Sri Lanka	2.0944e-14	1.0674e-14	9.5533e-15	3.2558e-15	2.0842e-14
Chad	4.7917e-16	4.2358e-16	3.6348e-16	1.635e-16	3.3122e-16
Chile	5.1267e-15	3.4788e-15	2.9052e-15	7.961e-16	5.3715e-15
China, mainland	2.6168e-15	2.2319e-15	1.5477e-15	8.5918e-16	3.1617e-15
Colombia	2.8172e-14	1.7121e-14	8.3579e-15	5.6068e-15	3.5112e-14
Congo	6.2472e-15	4.4604e-15	3.1985e-15	1.6233e-15	5.1286e-15
Costa Rica	7.5715e-14	5.6236e-14	2.8035e-14	2.5677e-14	3.4988e-14
Cuba	1.8971e-14	1.7974e-14	8.1671e-15	2.91e-15	1.9041e-14
Cyprus	1.2904e-14	4.5094e-15	6.984e-15	3.3697e-15	1.5505e-14
Czechoslovakia	0	0	0	0	0
Azerbaijan	2.6304e-15	2.1726e-15	1.3917e-15	6.1532e-16	2.4436e-15
Benin	2.3422e-15	1.8992e-15	1.3023e-15	6.4053e-16	2.0159e-15
Denmark	4.3106e-16	3.1152e-16	5.6545e-16	1.3317e-16	3.5794e-16
Dominica	1.6249e-13	1.8769e-13	8.0964e-14	2.3314e-14	3.4809e-13
Dominican Republic	3.6579e-14	3.4211e-14	8.9102e-15	5.2263e-15	3.4759e-14
Belarus	3.902e-16	2.8851e-16	2.2763e-16	1.0616e-16	3.4922e-16
Ecuador	5.0579e-14	3.0956e-14	7.0202e-15	1.0359e-14	4.2357e-14
Egypt	3.5228e-16	3.3026e-16	6.1743e-16	2.6606e-16	2.7531e-16
El Salvador	3.1344e-14	2.5836e-14	2.1912e-14	7.194e-15	2.592e-14
Estonia	3.215e-16	2.4724e-16	1.8648e-16	8.5693e-17	2.9435e-16
Fiji	6.3579e-14	6.1457e-14	2.5873e-14	9.2643e-15	1.0454e-13
Finland	2.5795e-16	2.4724e-16	1.3638e-16	5.4155e-17	2.448e-16
France	2.6025e-15	2.188e-15	1.2738e-15	7.9857e-16	1.6747e-15
French Polynesia	0	0	0	0	0
Djibouti	1.1086e-15	1.0585e-15	4.0498e-16	1.5924e-16	1.6953e-15
Georgia	4.3092e-15	3.6083e-15	2.187e-15	9.312e-16	4.1288e-15
Gabon	1.4523e-14	9.0638e-15	6.424e-15	3.2513e-15	5.4967e-15
Gambia	2.9716e-15	2.4e-15	1.6416e-15	8.0321e-16	2.5634e-15
Germany	9.4681e-16	6.6671e-16	6.0517e-16	3.0198e-16	7.6143e-16
Bosnia and Herzegovina	2.308e-15	1.6489e-15	7.3384e-16	6.6706e-16	1.9768e-15
Ghana	6.4539e-15	5.2346e-15	3.5075e-15	1.7222e-15	5.4856e-15
Kiribati	8.3681e-16	4.952e-16	7.8908e-16	3.27e-16	1.2813e-15
Greece	5.7854e-15	4.3738e-15	3.3646e-15	1.631e-15	3.708e-15
Grenada	1.0945e-13	1.8008e-13	8.9102e-15	1.9081e-14	2.1677e-14
Guatemala	3.7597e-14	2.9621e-14	2.3861e-14	1.0931e-14	3.2746e-14
Guinea	5.2187e-15	4.2359e-15	2.8343e-15	1.3843e-15	4.1822e-15
Guyana	4.1407e-15	5.2925e-15	3.7711e-15	2.2495e-15	6.7245e-15
Haiti	3.6375e-14	3.4118e-14	8.9102e-15	5.1093e-15	3.4666e-14
Honduras	5.6195e-14	4.1111e-14	5.1913e-14	2.1906e-14	2.9231e-14
China, Hong Kong SAR	2.6168e-15	2.2319e-15	1.5477e-15	8.5918e-16	3.1617e-15
Hungary	1.2524e-15	8.8125e-16	7.3384e-16	3.4505e-16	1.0893e-15
Croatia	2.4443e-15	1.7675e-15	7.3384e-16	6.844e-16	2.1118e-15
Iceland	7.3556e-17	5.5404e-17	1.7659e-15	5.1107e-16	9.1155e-17
India	2.9138e-15	2.6212e-15	1.0622e-15	4.8197e-16	2.9116e-15
Indonesia	2.099e-14	1.2877e-14	4.5581e-15	7.6678e-15	8.7138e-15
Iran (Islamic Republic of)	1.0176e-15	9.1761e-16	5.8575e-16	1.9036e-16	8.2645e-16
Iraq	2.5304e-15	2.41e-15	6.8639e-16	2.7116e-16	2.0803e-15
Ireland	5.5285e-16	4.1098e-16	3.7913e-16	1.7356e-16	5.0946e-16
Israel	4.4904e-15	3.9702e-15	3.2148e-15	1.4933e-15	3.8862e-15
Italy	5.0236e-15	4.0681e-15	4.82e-15	1.4908e-15	4.2789e-15
Côte d'Ivoire	7.5458e-15	6.1486e-15	4.068e-15	1.988e-15	6.4244e-15
Kazakhstan	3.4512e-16	2.8723e-16	2.2853e-16	7.6106e-17	3.3805e-16
Jamaica	8.6319e-14	7.4435e-14	8.9102e-15	1.6585e-14	7.4242e-14
Japan	9.1597e-15	8.7404e-15	1.5418e-15	1.6499e-15	8.3916e-15
Jordan	3.2715e-15	3.0025e-15	3.2203e-15	1.4968e-15	2.7503e-15
Kyrgyzstan	8.8757e-16	7.488e-16	5.9978e-16	1.8915e-16	9.0332e-16
Kenya	6.99e-15	4.9464e-15	3.8415e-15	1.8948e-15	6.8987e-15
Cambodia	5.7974e-15	5.7402e-15	2.8869e-15	1.0706e-15	5.7598e-15
Democratic People's Republic of Korea	1.8872e-15	1.2797e-15	5.1604e-16	4.8125e-16	1.6634e-15
Republic of Korea	3.7835e-15	9.7897e-16	5.1628e-16	1.0553e-15	3.2365e-15
Kuwait	3.4506e-15	3.3003e-15	3.9078e-16	1.8469e-16	2.7515e-15
Latvia	3.215e-16	2.4724e-16	1.8648e-16	8.5693e-17	2.9435e-16
Lao People's Democratic Republic	1.3339e-14	1.1559e-14	6.1298e-15	2.3667e-15	1.1061e-14
Lebanon	5.5266e-15	4.6237e-15	2.9654e-15	1.334e-15	5.1362e-15
Lesotho	7.6208e-15	6.097e-15	5.5836e-15	2.7035e-15	2.858e-15
Liberia	1.133e-14	9.2906e-15	6.0147e-15	2.9128e-15	9.6991e-15
Libya	1.8115e-16	2.0154e-16	8.2199e-16	3.5332e-16	1.8197e-16
Lithuania	3.6196e-16	2.7154e-16	2.1071e-16	9.7745e-17	3.2666e-16
China, Macao SAR	2.6168e-15	2.2319e-15	1.5477e-15	8.5918e-16	3.1617e-15
Madagascar	6.3013e-14	5.0035e-14	2.744e-14	1.7414e-14	4.2069e-14
Malawi	8.1499e-15	5.5372e-15	4.4783e-15	2.1533e-15	4.8968e-15
Malaysia	2.7215e-14	1.1559e-14	6.904e-15	5.912e-15	1.341e-14
Maldives	6.9773e-16	3.9089e-16	7.1526e-16	3.5312e-16	1.1829e-15
Mali	6.8074e-16	8.5149e-16	6.1561e-16	2.928e-16	7.4431e-16
Malta	9.5835e-15	7.1284e-15	5.5161e-15	2.6897e-15	8.2241e-15
Mauritania	2.8663e-16	5.5804e-16	2.4023e-16	1.005e-16	2.9945e-16
Mauritius	4.0448e-14	6.3398e-14	2.2202e-14	7.7088e-15	7.0641e-14
Mexico	1.4189e-14	1.0316e-14	9.1217e-15	4.0664e-15	8.5695e-15
Mongolia	5.082e-16	4.5937e-16	1.1207e-16	5.0166e-17	2.7102e-16
Morocco	2.0801e-15	1.7635e-15	1.3432e-15	5.6652e-16	2.0754e-15
Mozambique	7.9418e-15	6.1887e-15	4.6004e-15	2.3141e-15	6.4873e-15
Republic of Moldova	4.5704e-16	3.4282e-16	2.6115e-16	1.1943e-16	4.1532e-16
Namibia	1.9168e-15	1.5907e-15	9.5802e-16	4.6566e-16	1.0018e-15
Nepal	4.5257e-15	4.5451e-15	2.0497e-15	8.4417e-16	5.0335e-15
Netherlands	3.1708e-15	2.8323e-15	6.4194e-16	5.7092e-16	8.7231e-16
Netherlands Antilles	0	0	0	0	0
New Caledonia	0	0	0	0	0
North Macedonia	2.3503e-15	1.7034e-15	1.3893e-15	6.8044e-16	1.6954e-15
Vanuatu	5.0739e-13	2.822e-13	1.0506e-13	3.8322e-14	3.9221e-14
New Zealand	7.0324e-15	6.0895e-15	3.8159e-15	1.6128e-15	6.3154e-15
Nicaragua	6.1745e-14	4.2766e-14	6.5751e-14	2.7285e-14	2.0206e-14
Niger	4.0835e-16	7.9748e-16	3.9046e-16	1.7762e-16	4.4039e-16
Nigeria	4.19e-15	3.4298e-15	2.1788e-15	1.1514e-15	2.8822e-15
Norway	1.0621e-15	2.4756e-16	6.0621e-16	2.8931e-16	3.6126e-16
Pakistan	5.7686e-16	5.7097e-16	1.7344e-16	1.2875e-16	5.4917e-16
Panama	6.7518e-14	5.1203e-14	2.3022e-14	2.6017e-14	1.6502e-14
Czech Republic	9.6435e-16	6.7709e-16	5.9056e-16	3.0146e-16	7.8375e-16
Papua New Guinea	1.1443e-14	1.5011e-14	3.6072e-14	1.558e-14	1.657e-13
Paraguay	3.9772e-15	3.158e-15	2.0248e-15	9.533e-16	3.5817e-15
Peru	1.2222e-14	8.0153e-15	6.7085e-15	3.235e-15	3.2857e-15
Philippines	2.1685e-14	1.8169e-14	6.305e-15	3.2733e-15	1.7559e-14
Poland	4.6219e-16	3.3253e-16	2.7095e-16	1.3147e-16	4.0119e-16
Portugal	6.8184e-15	4.7302e-15	4.2662e-15	2.2542e-15	5.3858e-15
Guinea-Bissau	5.0675e-15	4.0691e-15	2.7864e-15	1.3623e-15	4.3619e-15
Timor-Leste	5.6547e-15	5.8147e-15	2.3324e-15	7.2279e-16	5.7127e-15
Puerto Rico	0	0	0	0	0
Eritrea	1.4075e-15	1.2807e-15	6.4289e-16	3.3575e-16	9.695e-16
Qatar	3.4506e-15	3.3003e-15	1.8076e-15	9.8783e-16	2.7515e-15
Zimbabwe	5.6028e-15	4.3149e-15	3.2173e-15	1.6336e-15	4.5755e-15
Romania	9.6606e-16	6.9049e-16	4.886e-16	2.6949e-16	8.4479e-16
Rwanda	1.2863e-14	1.1303e-14	6.706e-15	3.1832e-15	1.1385e-14
Russian Federation	2.7041e-16	3.8593e-16	1.1491e-16	5.827e-17	2.5787e-16
Serbia and Montenegro	0	0	0	0	0
Saint Kitts and Nevis	3.3491e-14	3.2081e-14	8.9102e-15	4.1692e-15	2.1677e-14
Saint Lucia	1.6249e-13	1.9283e-13	5.7833e-14	1.7249e-14	2.4154e-13
Saint Vincent and the Grenadines	6.2795e-14	1.2776e-13	8.9102e-15	1.5308e-14	2.1677e-14
Sao Tome and Principe	2.4061e-13	2.1031e-14	3.0856e-14	8.6926e-15	3.5894e-14
Saudi Arabia	3.2257e-15	3.0837e-15	2.9013e-15	1.5208e-15	2.583e-15
Senegal	1.9079e-15	1.5611e-15	1.0537e-15	5.1345e-16	1.657e-15
Sierra Leone	9.1141e-15	7.4463e-15	4.867e-15	2.3598e-15	7.8252e-15
Slovenia	2.3183e-15	1.634e-15	7.3384e-16	6.742e-16	1.9591e-15
Slovakia	1.1396e-15	7.9995e-16	7.3384e-16	3.247e-16	9.7736e-16
Singapore	1.6704e-14	1.4961e-13	7.6224e-15	3.1222e-15	1.5562e-14
Somalia	3.1607e-15	2.7007e-15	1.6758e-15	7.528e-16	9.8771e-15
South Africa	6.5138e-15	4.9749e-15	5.2054e-15	2.0378e-15	7.1858e-15
Spain	5.9777e-15	5.3053e-15	3.7203e-15	2.4445e-15	6.6491e-15
Suriname	4.3486e-15	3.396e-15	2.5347e-15	1.415e-15	9.8923e-15
Tajikistan	1.3277e-15	8.3431e-16	1.3949e-15	2.4838e-16	1.3027e-15
Eswatini	9.6496e-15	7.4276e-15	5.5769e-15	2.8482e-15	7.3586e-15
Sweden	4.1146e-16	2.434e-16	2.3216e-16	1.0292e-16	2.5905e-16
Switzerland	2.8039e-15	1.9334e-15	7.0822e-16	8.6656e-16	2.2643e-15
Syrian Arab Republic	2.5971e-15	2.1958e-15	3.1527e-15	1.4536e-15	2.4221e-15
Turkmenistan	4.8888e-16	4.6047e-16	6.0541e-16	2.0078e-16	4.8232e-16
China, Taiwan Province of	0	0	0	0	0
United Republic of Tanzania	1.0676e-14	8.6396e-15	5.9598e-15	2.8992e-15	7.0111e-15
Thailand	7.8947e-15	6.2499e-15	3.8619e-15	1.5004e-15	6.7637e-15
Togo	3.8442e-15	3.1183e-15	2.1101e-15	1.037e-15	3.2861e-15
Trinidad and Tobago	2.0304e-14	1.0079e-14	7.0925e-15	2.9203e-15	1.0516e-14
Oman	2.5489e-15	2.2413e-15	2.5407e-15	1.2347e-15	2.0808e-15
Tunisia	1.7319e-15	1.4566e-15	1.4606e-15	6.2684e-16	1.6662e-15
Turkey	2.768e-15	2.286e-15	2.6303e-15	7.0108e-16	3.2007e-15
United Arab Emirates	2.9992e-15	2.87e-15	2.6456e-15	1.4337e-15	2.4159e-15
Uganda	6.1221e-15	5.1871e-15	3.3083e-15	1.6251e-15	6.8482e-15
USSR	0	0	0	0	0
United Kingdom	7.0438e-16	5.9001e-16	4.4174e-16	2.1579e-16	5.9605e-16
Ukraine	5.4867e-16	4.1611e-16	2.7983e-16	1.4163e-16	4.9771e-16
United States of America	1.8647e-15	1.5321e-15	9.493e-16	4.644e-16	1.7836e-15
Burkina Faso	1.6676e-15	1.3643e-15	9.2522e-16	4.5141e-16	1.4488e-15
Uruguay	3.6876e-15	2.9218e-15	1.8886e-15	8.8632e-16	3.1158e-15
Uzbekistan	4.6831e-16	4.315e-16	8.7724e-16	2.4838e-16	4.5811e-16
Venezuela (Bolivarian Republic of)	8.8366e-15	8.608e-15	6.8291e-15	7.87e-15	2.5014e-14
Viet Nam	1.2627e-14	9.9869e-15	6.4721e-15	2.302e-15	1.0025e-14
Ethiopia	2.9506e-15	2.642e-15	1.2491e-15	6.3153e-16	4.3471e-15
Samoa	1.614e-14	9.2328e-15	1.3736e-14	4.35e-15	1.7776e-14
Yugoslav SFR	0	0	0	0	0
Yemen	1.4398e-15	1.3641e-15	2.1921e-15	9.9246e-16	1.246e-15
Democratic Republic of the Congo	7.0766e-15	3.9685e-15	2.3524e-15	1.0795e-15	5.9533e-15
Zambia	5.4621e-15	4.09e-15	2.8599e-15	1.4081e-15	4.6258e-15
Belgium	9.7718e-16	6.9505e-16	6.0203e-16	3.0966e-16	7.9394e-16
Luxembourg	1.1388e-15	7.9528e-16	7.0822e-16	3.7194e-16	8.9828e-16
Serbia	1.5075e-15	1.0789e-15	7.3384e-16	4.1505e-16	1.3305e-15
Montenegro	3.0611e-15	2.2085e-15	1.7905e-15	8.7971e-16	2.6255e-15
Sudan	3.8219e-16	3.5289e-16	2.8132e-16	1.2161e-16	3.8093e-16
South Sudan	1.97e-15	1.8975e-15	1.2881e-15	6.2464e-16	3.6607e-15
RoW	9.2581e-15	7.2901e-15	4.8325e-15	2.1813e-15	2.0969e-14

## Sheet: S2-3
EXIOBASE / FABEXIO	GLAM Impact Category
stressor	Impact Category	Characterization factors (CFs)	Unit
CO2 - combustion - air	EQ Climate Change - TR-Carbon dioxide	4.82e-17	kg Global PDF*yr
CH4 - combustion - air	EQ Climate Change - TR-Methane	1.9e-15	kg Global PDF*yr
N2O - combustion - air	EQ Climate Change - TR-Nitrous oxide	1.9e-15	kg Global PDF*yr
CH4 - non combustion - Extraction/production of (natural) gas - air	EQ Climate Change - TR-Methane	1.9e-15	kg Global PDF*yr
CH4 - non combustion - Extraction/production of crude oil - air	EQ Climate Change - TR-Methane	1.9e-15	kg Global PDF*yr
CH4 - non combustion - Mining of antracite - air	EQ Climate Change - TR-Methane	1.9e-15	kg Global PDF*yr
CH4 - non combustion - Mining of bituminous coal - air	EQ Climate Change - TR-Methane	1.9e-15	kg Global PDF*yr
CH4 - non combustion - Mining of coking coal - air	EQ Climate Change - TR-Methane	1.9e-15	kg Global PDF*yr
CH4 - non combustion - Mining of lignite (brown coal) - air	EQ Climate Change - TR-Methane	1.9e-15	kg Global PDF*yr
CH4 - non combustion - Mining of sub-bituminous coal - air	EQ Climate Change - TR-Methane	1.9e-15	kg Global PDF*yr
CH4 - non combustion - Oil refinery - air	EQ Climate Change - TR-Methane	1.9e-15	kg Global PDF*yr
CO2 - non combustion - Cement production - air	EQ Climate Change - TR-Carbon dioxide	4.82e-17	kg Global PDF*yr
CO2 - non combustion - Lime production - air	EQ Climate Change - TR-Carbon dioxide	4.82e-17	kg Global PDF*yr
SF6 - air	EQ Climate Change - Sulphur hexafluoride	2.34e-13	kg Global PDF*yr
CH4 - agriculture - air	EQ Climate Change - TR-Methane	1.9e-15	kg Global PDF*yr
CO2 - agriculture - peat decay - air	EQ Climate Change - TR-Carbon dioxide	4.82e-17	kg Global PDF*yr
N2O - agriculture - air	EQ Climate Change - TR-Nitrous oxide	1.37e-14	kg Global PDF*yr
CH4 - waste - air	EQ Climate Change - TR-Methane	1.9e-15	kg Global PDF*yr
CO2 - waste - biogenic - air	EQ Climate Change - TR-Carbon dioxide	4.82e-17	kg Global PDF*yr
CO2 - waste - fossil - air	EQ Climate Change - TR-Carbon dioxide	4.82e-17	kg Global PDF*yr

## Sheet: S2-4
MRIO model	GLAM
		Characterization factors (CFs)
EXIOBASE / FAEXIO			AT	BE	BG	CY	CZ	DE	DK	EE	ES	FI	FR	GR	HR	HU	IE	IT	LT	LU	LV	MT	NL	PL	PT	RO	SE	SI	SK	GB	US	JP	CN	CA	KR	BR	IN	MX	RU	AU	CH	TR	TW	NO	ID	ZA	WA	WL	WE
stressor	Impact Category	Unit
Cropland - Cereal grains nec	EQ Land Occupation - TR - Permanent crop	PDF*yr/m2	2.8324e-15	9.7718e-16	1.6058e-15	1.2904e-14	9.6435e-16	9.4681e-16	4.3106e-16	3.215e-16	5.9777e-15	2.5795e-16	2.6025e-15	5.7854e-15	2.4443e-15	1.2524e-15	5.5285e-16	5.0236e-15	3.6196e-16	1.1388e-15	3.215e-16	9.5835e-15	3.1708e-15	4.6219e-16	6.8184e-15	9.6606e-16	4.1146e-16	2.3183e-15	1.1396e-15	7.0438e-16	1.8647e-15	9.1597e-15	2.6168e-15	4.6084e-16	3.7835e-15	6.8928e-15	2.9138e-15	1.4189e-14	2.7041e-16	9.1462e-15	2.8039e-15	2.768e-15	0	1.0621e-15	2.099e-14	6.5138e-15	9.2581e-15	9.2581e-15	9.2581e-15
Cropland - Paddy rice	EQ Land Occupation - TR - Permanent crop	PDF*yr/m2	2.8324e-15	9.7718e-16	1.6058e-15	1.2904e-14	9.6435e-16	9.4681e-16	4.3106e-16	3.215e-16	5.9777e-15	2.5795e-16	2.6025e-15	5.7854e-15	2.4443e-15	1.2524e-15	5.5285e-16	5.0236e-15	3.6196e-16	1.1388e-15	3.215e-16	9.5835e-15	3.1708e-15	4.6219e-16	6.8184e-15	9.6606e-16	4.1146e-16	2.3183e-15	1.1396e-15	7.0438e-16	1.8647e-15	9.1597e-15	2.6168e-15	4.6084e-16	3.7835e-15	6.8928e-15	2.9138e-15	1.4189e-14	2.7041e-16	9.1462e-15	2.8039e-15	2.768e-15	0	1.0621e-15	2.099e-14	6.5138e-15	9.2581e-15	9.2581e-15	9.2581e-15
Cropland - Sugar cane, sugar beet	EQ Land Occupation - TR - Permanent crop	PDF*yr/m2	2.8324e-15	9.7718e-16	1.6058e-15	1.2904e-14	9.6435e-16	9.4681e-16	4.3106e-16	3.215e-16	5.9777e-15	2.5795e-16	2.6025e-15	5.7854e-15	2.4443e-15	1.2524e-15	5.5285e-16	5.0236e-15	3.6196e-16	1.1388e-15	3.215e-16	9.5835e-15	3.1708e-15	4.6219e-16	6.8184e-15	9.6606e-16	4.1146e-16	2.3183e-15	1.1396e-15	7.0438e-16	1.8647e-15	9.1597e-15	2.6168e-15	4.6084e-16	3.7835e-15	6.8928e-15	2.9138e-15	1.4189e-14	2.7041e-16	9.1462e-15	2.8039e-15	2.768e-15	0	1.0621e-15	2.099e-14	6.5138e-15	9.2581e-15	9.2581e-15	9.2581e-15
Cropland - Wheat	EQ Land Occupation - TR - Permanent crop	PDF*yr/m2	2.8324e-15	9.7718e-16	1.6058e-15	1.2904e-14	9.6435e-16	9.4681e-16	4.3106e-16	3.215e-16	5.9777e-15	2.5795e-16	2.6025e-15	5.7854e-15	2.4443e-15	1.2524e-15	5.5285e-16	5.0236e-15	3.6196e-16	1.1388e-15	3.215e-16	9.5835e-15	3.1708e-15	4.6219e-16	6.8184e-15	9.6606e-16	4.1146e-16	2.3183e-15	1.1396e-15	7.0438e-16	1.8647e-15	9.1597e-15	2.6168e-15	4.6084e-16	3.7835e-15	6.8928e-15	2.9138e-15	1.4189e-14	2.7041e-16	9.1462e-15	2.8039e-15	2.768e-15	0	1.0621e-15	2.099e-14	6.5138e-15	9.2581e-15	9.2581e-15	9.2581e-15
Permanent pastures - Grazing-Cattle	EQ Land Occupation - TR -Pasture	PDF*yr/m2	1.9537e-15	6.9505e-16	1.1403e-15	4.5094e-15	6.7709e-16	6.6671e-16	3.1152e-16	2.4724e-16	5.3053e-15	2.4724e-16	2.188e-15	4.3738e-15	1.7675e-15	8.8125e-16	4.1098e-16	4.0681e-15	2.7154e-16	7.9528e-16	2.4724e-16	7.1284e-15	2.8323e-15	3.3253e-16	4.7302e-15	6.9049e-16	2.434e-16	1.634e-15	7.9995e-16	5.9001e-16	1.5321e-15	8.7404e-15	2.2319e-15	2.244e-16	9.7897e-16	5.706e-15	2.6212e-15	1.0316e-14	3.8593e-16	4.323e-15	1.9334e-15	2.286e-15	0	2.4756e-16	1.2877e-14	4.9749e-15	7.2901e-15	7.2901e-15	7.2901e-15
Permanent pastures - Grazing-Meat animals nec	EQ Land Occupation - TR -Pasture	PDF*yr/m2	1.9537e-15	6.9505e-16	1.1403e-15	4.5094e-15	6.7709e-16	6.6671e-16	3.1152e-16	2.4724e-16	5.3053e-15	2.4724e-16	2.188e-15	4.3738e-15	1.7675e-15	8.8125e-16	4.1098e-16	4.0681e-15	2.7154e-16	7.9528e-16	2.4724e-16	7.1284e-15	2.8323e-15	3.3253e-16	4.7302e-15	6.9049e-16	2.434e-16	1.634e-15	7.9995e-16	5.9001e-16	1.5321e-15	8.7404e-15	2.2319e-15	2.244e-16	9.7897e-16	5.706e-15	2.6212e-15	1.0316e-14	3.8593e-16	4.323e-15	1.9334e-15	2.286e-15	0	2.4756e-16	1.2877e-14	4.9749e-15	7.2901e-15	7.2901e-15	7.2901e-15
Permanent pastures - Grazing-Raw milk	EQ Land Occupation - TR -Pasture	PDF*yr/m2	1.9537e-15	6.9505e-16	1.1403e-15	4.5094e-15	6.7709e-16	6.6671e-16	3.1152e-16	2.4724e-16	5.3053e-15	2.4724e-16	2.188e-15	4.3738e-15	1.7675e-15	8.8125e-16	4.1098e-16	4.0681e-15	2.7154e-16	7.9528e-16	2.4724e-16	7.1284e-15	2.8323e-15	3.3253e-16	4.7302e-15	6.9049e-16	2.434e-16	1.634e-15	7.9995e-16	5.9001e-16	1.5321e-15	8.7404e-15	2.2319e-15	2.244e-16	9.7897e-16	5.706e-15	2.6212e-15	1.0316e-14	3.8593e-16	4.323e-15	1.9334e-15	2.286e-15	0	2.4756e-16	1.2877e-14	4.9749e-15	7.2901e-15	7.2901e-15	7.2901e-15
Cropland - Crops nec	EQ Land Occupation - TR - Permanent crop	PDF*yr/m2	2.8324e-15	9.7718e-16	1.6058e-15	1.2904e-14	9.6435e-16	9.4681e-16	4.3106e-16	3.215e-16	5.9777e-15	2.5795e-16	2.6025e-15	5.7854e-15	2.4443e-15	1.2524e-15	5.5285e-16	5.0236e-15	3.6196e-16	1.1388e-15	3.215e-16	9.5835e-15	3.1708e-15	4.6219e-16	6.8184e-15	9.6606e-16	4.1146e-16	2.3183e-15	1.1396e-15	7.0438e-16	1.8647e-15	9.1597e-15	2.6168e-15	4.6084e-16	3.7835e-15	6.8928e-15	2.9138e-15	1.4189e-14	2.7041e-16	9.1462e-15	2.8039e-15	2.768e-15	0	1.0621e-15	2.099e-14	6.5138e-15	9.2581e-15	9.2581e-15	9.2581e-15
Cropland - Fodder crops-Pigs	EQ Land Occupation - TR - Permanent crop	PDF*yr/m2	2.8324e-15	9.7718e-16	1.6058e-15	1.2904e-14	9.6435e-16	9.4681e-16	4.3106e-16	3.215e-16	5.9777e-15	2.5795e-16	2.6025e-15	5.7854e-15	2.4443e-15	1.2524e-15	5.5285e-16	5.0236e-15	3.6196e-16	1.1388e-15	3.215e-16	9.5835e-15	3.1708e-15	4.6219e-16	6.8184e-15	9.6606e-16	4.1146e-16	2.3183e-15	1.1396e-15	7.0438e-16	1.8647e-15	9.1597e-15	2.6168e-15	4.6084e-16	3.7835e-15	6.8928e-15	2.9138e-15	1.4189e-14	2.7041e-16	9.1462e-15	2.8039e-15	2.768e-15	0	1.0621e-15	2.099e-14	6.5138e-15	9.2581e-15	9.2581e-15	9.2581e-15
Cropland - Fodder crops-Cattle	EQ Land Occupation - TR - Permanent crop	PDF*yr/m2	2.8324e-15	9.7718e-16	1.6058e-15	1.2904e-14	9.6435e-16	9.4681e-16	4.3106e-16	3.215e-16	5.9777e-15	2.5795e-16	2.6025e-15	5.7854e-15	2.4443e-15	1.2524e-15	5.5285e-16	5.0236e-15	3.6196e-16	1.1388e-15	3.215e-16	9.5835e-15	3.1708e-15	4.6219e-16	6.8184e-15	9.6606e-16	4.1146e-16	2.3183e-15	1.1396e-15	7.0438e-16	1.8647e-15	9.1597e-15	2.6168e-15	4.6084e-16	3.7835e-15	6.8928e-15	2.9138e-15	1.4189e-14	2.7041e-16	9.1462e-15	2.8039e-15	2.768e-15	0	1.0621e-15	2.099e-14	6.5138e-15	9.2581e-15	9.2581e-15	9.2581e-15
Cropland - Fodder crops-Meat animals nec	EQ Land Occupation - TR - Permanent crop	PDF*yr/m2	2.8324e-15	9.7718e-16	1.6058e-15	1.2904e-14	9.6435e-16	9.4681e-16	4.3106e-16	3.215e-16	5.9777e-15	2.5795e-16	2.6025e-15	5.7854e-15	2.4443e-15	1.2524e-15	5.5285e-16	5.0236e-15	3.6196e-16	1.1388e-15	3.215e-16	9.5835e-15	3.1708e-15	4.6219e-16	6.8184e-15	9.6606e-16	4.1146e-16	2.3183e-15	1.1396e-15	7.0438e-16	1.8647e-15	9.1597e-15	2.6168e-15	4.6084e-16	3.7835e-15	6.8928e-15	2.9138e-15	1.4189e-14	2.7041e-16	9.1462e-15	2.8039e-15	2.768e-15	0	1.0621e-15	2.099e-14	6.5138e-15	9.2581e-15	9.2581e-15	9.2581e-15
Cropland - Fodder crops-Poultry	EQ Land Occupation - TR - Permanent crop	PDF*yr/m2	2.8324e-15	9.7718e-16	1.6058e-15	1.2904e-14	9.6435e-16	9.4681e-16	4.3106e-16	3.215e-16	5.9777e-15	2.5795e-16	2.6025e-15	5.7854e-15	2.4443e-15	1.2524e-15	5.5285e-16	5.0236e-15	3.6196e-16	1.1388e-15	3.215e-16	9.5835e-15	3.1708e-15	4.6219e-16	6.8184e-15	9.6606e-16	4.1146e-16	2.3183e-15	1.1396e-15	7.0438e-16	1.8647e-15	9.1597e-15	2.6168e-15	4.6084e-16	3.7835e-15	6.8928e-15	2.9138e-15	1.4189e-14	2.7041e-16	9.1462e-15	2.8039e-15	2.768e-15	0	1.0621e-15	2.099e-14	6.5138e-15	9.2581e-15	9.2581e-15	9.2581e-15
Cropland - Fodder crops-Raw milk	EQ Land Occupation - TR - Permanent crop	PDF*yr/m2	2.8324e-15	9.7718e-16	1.6058e-15	1.2904e-14	9.6435e-16	9.4681e-16	4.3106e-16	3.215e-16	5.9777e-15	2.5795e-16	2.6025e-15	5.7854e-15	2.4443e-15	1.2524e-15	5.5285e-16	5.0236e-15	3.6196e-16	1.1388e-15	3.215e-16	9.5835e-15	3.1708e-15	4.6219e-16	6.8184e-15	9.6606e-16	4.1146e-16	2.3183e-15	1.1396e-15	7.0438e-16	1.8647e-15	9.1597e-15	2.6168e-15	4.6084e-16	3.7835e-15	6.8928e-15	2.9138e-15	1.4189e-14	2.7041e-16	9.1462e-15	2.8039e-15	2.768e-15	0	1.0621e-15	2.099e-14	6.5138e-15	9.2581e-15	9.2581e-15	9.2581e-15
Cropland - Oil seeds	EQ Land Occupation - TR - Permanent crop	PDF*yr/m2	2.8324e-15	9.7718e-16	1.6058e-15	1.2904e-14	9.6435e-16	9.4681e-16	4.3106e-16	3.215e-16	5.9777e-15	2.5795e-16	2.6025e-15	5.7854e-15	2.4443e-15	1.2524e-15	5.5285e-16	5.0236e-15	3.6196e-16	1.1388e-15	3.215e-16	9.5835e-15	3.1708e-15	4.6219e-16	6.8184e-15	9.6606e-16	4.1146e-16	2.3183e-15	1.1396e-15	7.0438e-16	1.8647e-15	9.1597e-15	2.6168e-15	4.6084e-16	3.7835e-15	6.8928e-15	2.9138e-15	1.4189e-14	2.7041e-16	9.1462e-15	2.8039e-15	2.768e-15	0	1.0621e-15	2.099e-14	6.5138e-15	9.2581e-15	9.2581e-15	9.2581e-15
Cropland - Plant-based fibers	EQ Land Occupation - TR - Permanent crop	PDF*yr/m2	2.8324e-15	9.7718e-16	1.6058e-15	1.2904e-14	9.6435e-16	9.4681e-16	4.3106e-16	3.215e-16	5.9777e-15	2.5795e-16	2.6025e-15	5.7854e-15	2.4443e-15	1.2524e-15	5.5285e-16	5.0236e-15	3.6196e-16	1.1388e-15	3.215e-16	9.5835e-15	3.1708e-15	4.6219e-16	6.8184e-15	9.6606e-16	4.1146e-16	2.3183e-15	1.1396e-15	7.0438e-16	1.8647e-15	9.1597e-15	2.6168e-15	4.6084e-16	3.7835e-15	6.8928e-15	2.9138e-15	1.4189e-14	2.7041e-16	9.1462e-15	2.8039e-15	2.768e-15	0	1.0621e-15	2.099e-14	6.5138e-15	9.2581e-15	9.2581e-15	9.2581e-15
Cropland - Vegetables, fruit, nuts	EQ Land Occupation - TR - Permanent crop	PDF*yr/m2	2.8324e-15	9.7718e-16	1.6058e-15	1.2904e-14	9.6435e-16	9.4681e-16	4.3106e-16	3.215e-16	5.9777e-15	2.5795e-16	2.6025e-15	5.7854e-15	2.4443e-15	1.2524e-15	5.5285e-16	5.0236e-15	3.6196e-16	1.1388e-15	3.215e-16	9.5835e-15	3.1708e-15	4.6219e-16	6.8184e-15	9.6606e-16	4.1146e-16	2.3183e-15	1.1396e-15	7.0438e-16	1.8647e-15	9.1597e-15	2.6168e-15	4.6084e-16	3.7835e-15	6.8928e-15	2.9138e-15	1.4189e-14	2.7041e-16	9.1462e-15	2.8039e-15	2.768e-15	0	1.0621e-15	2.099e-14	6.5138e-15	9.2581e-15	9.2581e-15	9.2581e-15
Forest area - Forestry	EQ Land Occupation - TR - Forest, intensive	PDF*yr/m2	6.9158e-16	6.0203e-16	2.4068e-16	6.984e-15	5.9056e-16	6.0517e-16	5.6545e-16	1.8648e-16	3.7203e-15	1.3638e-16	1.2738e-15	3.3646e-15	7.3384e-16	7.3384e-16	3.7913e-16	4.82e-15	2.1071e-16	7.0822e-16	1.8648e-16	5.5161e-15	6.4194e-16	2.7095e-16	4.2662e-15	4.886e-16	2.3216e-16	7.3384e-16	7.3384e-16	4.4174e-16	9.493e-16	1.5418e-15	1.5477e-15	1.8013e-16	5.1628e-16	4.1518e-15	1.0622e-15	9.1217e-15	1.1491e-16	7.3638e-15	7.0822e-16	2.6303e-15	0	6.0621e-16	4.5581e-15	5.2054e-15	4.8325e-15	4.8325e-15	4.8325e-15
Other land Use: Total	EQ Land Occupation - TR - Forest, intensive	PDF*yr/m2	6.9158e-16	6.0203e-16	2.4068e-16	6.984e-15	5.9056e-16	6.0517e-16	5.6545e-16	1.8648e-16	3.7203e-15	1.3638e-16	1.2738e-15	3.3646e-15	7.3384e-16	7.3384e-16	3.7913e-16	4.82e-15	2.1071e-16	7.0822e-16	1.8648e-16	5.5161e-15	6.4194e-16	2.7095e-16	4.2662e-15	4.886e-16	2.3216e-16	7.3384e-16	7.3384e-16	4.4174e-16	9.493e-16	1.5418e-15	1.5477e-15	1.8013e-16	5.1628e-16	4.1518e-15	1.0622e-15	9.1217e-15	1.1491e-16	7.3638e-15	7.0822e-16	2.6303e-15	0	6.0621e-16	4.5581e-15	5.2054e-15	4.8325e-15	4.8325e-15	4.8325e-15
Forest area - Marginal use	EQ Land Occupation - TR - Forest, Extensive	PDF*yr/m2	8.6236e-16	3.0966e-16	4.7361e-16	3.3697e-15	3.0146e-16	3.0198e-16	1.3317e-16	8.5693e-17	2.4445e-15	5.4155e-17	7.9857e-16	1.631e-15	6.844e-16	3.4505e-16	1.7356e-16	1.4908e-15	9.7745e-17	3.7194e-16	8.5693e-17	2.6897e-15	5.7092e-16	1.3147e-16	2.2542e-15	2.6949e-16	1.0292e-16	6.742e-16	3.247e-16	2.1579e-16	4.644e-16	1.6499e-15	8.5918e-16	8.9293e-17	1.0553e-15	2.9623e-15	4.8197e-16	4.0664e-15	5.827e-17	3.0636e-15	8.6656e-16	7.0108e-16	0	2.8931e-16	7.6678e-15	2.0378e-15	2.1813e-15	2.1813e-15	2.1813e-15
Infrastructure land	EQ Land Occupation - TR - Urban	PDF*yr/m2	2.308e-15	7.9394e-16	1.3785e-15	1.5505e-14	7.8375e-16	7.6143e-16	3.5794e-16	2.9435e-16	6.6491e-15	2.448e-16	1.6747e-15	3.708e-15	2.1118e-15	1.0893e-15	5.0946e-16	4.2789e-15	3.2666e-16	8.9828e-16	2.9435e-16	8.2241e-15	8.7231e-16	4.0119e-16	5.3858e-15	8.4479e-16	2.5905e-16	1.9591e-15	9.7736e-16	5.9605e-16	1.7836e-15	8.3916e-15	3.1617e-15	5.4007e-16	3.2365e-15	6.3485e-15	2.9116e-15	8.5695e-15	2.5787e-16	1.4137e-14	2.2643e-15	3.2007e-15	0	3.6126e-16	8.7138e-15	7.1858e-15	2.0969e-14	2.0969e-14	2.0969e-14
[truncated: 2 more columns]

## Sheet: S2-5
MRIO model	GLAM
			Characterization factors (CFs)
FABIO	Impact Category	Unit	Armenia	Afghanistan	Albania	Algeria	Angola	Antigua and Barbuda	Argentina	Australia	Austria	Bahamas	Bahrain	Barbados	Belgium-Luxembourg	Bangladesh	Bolivia (Plurinational State of)	Botswana	Brazil	Belize	Solomon Islands	Brunei Darussalam	Bulgaria	Myanmar	Burundi	Cameroon	Canada	Cabo Verde	Central African Republic	Sri Lanka	Chad	Chile	China, mainland	Colombia	Congo	Costa Rica	Cuba	Cyprus	Czechoslovakia	Azerbaijan	Benin	Denmark	Dominica	Dominican Republic	Belarus	Ecuador	Egypt	El Salvador	Estonia
Cropland - Cereal grains nec	EQ Land Occupation - TR - Permanent crop	PDF*yr/m2	4.5947e-15	4.5011e-16	4.5821e-15	4.3453e-16	2.8268e-15	1.6249e-13	2.7751e-15	9.1462e-15	2.8324e-15	2.2863e-14	3.5088e-16	1.6249e-13	0	2.0764e-15	4.8848e-15	2.8834e-15	6.8928e-15	2.6852e-14	1.1988e-13	1.5274e-14	1.6058e-15	1.0175e-14	9.7781e-15	1.8494e-14	4.6084e-16	1.2692e-13	1.3531e-15	2.0944e-14	4.7917e-16	5.1267e-15	2.6168e-15	2.8172e-14	6.2472e-15	7.5715e-14	1.8971e-14	1.2904e-14	0	2.6304e-15	2.3422e-15	4.3106e-16	1.6249e-13	3.6579e-14	3.902e-16	5.0579e-14	3.5228e-16	3.1344e-14	3.215e-16
Cropland - Paddy rice	EQ Land Occupation - TR - Permanent crop	PDF*yr/m2	4.5947e-15	4.5011e-16	4.5821e-15	4.3453e-16	2.8268e-15	1.6249e-13	2.7751e-15	9.1462e-15	2.8324e-15	2.2863e-14	3.5088e-16	1.6249e-13	0	2.0764e-15	4.8848e-15	2.8834e-15	6.8928e-15	2.6852e-14	1.1988e-13	1.5274e-14	1.6058e-15	1.0175e-14	9.7781e-15	1.8494e-14	4.6084e-16	1.2692e-13	1.3531e-15	2.0944e-14	4.7917e-16	5.1267e-15	2.6168e-15	2.8172e-14	6.2472e-15	7.5715e-14	1.8971e-14	1.2904e-14	0	2.6304e-15	2.3422e-15	4.3106e-16	1.6249e-13	3.6579e-14	3.902e-16	5.0579e-14	3.5228e-16	3.1344e-14	3.215e-16
Cropland - Sugar cane, sugar beet	EQ Land Occupation - TR - Permanent crop	PDF*yr/m2	4.5947e-15	4.5011e-16	4.5821e-15	4.3453e-16	2.8268e-15	1.6249e-13	2.7751e-15	9.1462e-15	2.8324e-15	2.2863e-14	3.5088e-16	1.6249e-13	0	2.0764e-15	4.8848e-15	2.8834e-15	6.8928e-15	2.6852e-14	1.1988e-13	1.5274e-14	1.6058e-15	1.0175e-14	9.7781e-15	1.8494e-14	4.6084e-16	1.2692e-13	1.3531e-15	2.0944e-14	4.7917e-16	5.1267e-15	2.6168e-15	2.8172e-14	6.2472e-15	7.5715e-14	1.8971e-14	1.2904e-14	0	2.6304e-15	2.3422e-15	4.3106e-16	1.6249e-13	3.6579e-14	3.902e-16	5.0579e-14	3.5228e-16	3.1344e-14	3.215e-16
Cropland - Wheat	EQ Land Occupation - TR - Permanent crop	PDF*yr/m2	4.5947e-15	4.5011e-16	4.5821e-15	4.3453e-16	2.8268e-15	1.6249e-13	2.7751e-15	9.1462e-15	2.8324e-15	2.2863e-14	3.5088e-16	1.6249e-13	0	2.0764e-15	4.8848e-15	2.8834e-15	6.8928e-15	2.6852e-14	1.1988e-13	1.5274e-14	1.6058e-15	1.0175e-14	9.7781e-15	1.8494e-14	4.6084e-16	1.2692e-13	1.3531e-15	2.0944e-14	4.7917e-16	5.1267e-15	2.6168e-15	2.8172e-14	6.2472e-15	7.5715e-14	1.8971e-14	1.2904e-14	0	2.6304e-15	2.3422e-15	4.3106e-16	1.6249e-13	3.6579e-14	3.902e-16	5.0579e-14	3.5228e-16	3.1344e-14	3.215e-16
Other land - Grazing-Cattle	EQ Land Occupation - TR -Pasture	PDF*yr/m2	3.8824e-15	3.983e-16	3.2649e-15	2.004e-15	2.3325e-15	1.5856e-13	2.1491e-15	4.323e-15	1.9537e-15	2.166e-14	3.3769e-16	1.5856e-13	0	1.6326e-15	4.4701e-15	1.6613e-15	5.706e-15	2.0971e-14	6.7176e-14	1.1743e-14	1.1403e-15	1.1351e-14	8.2954e-15	8.5192e-15	2.244e-16	1.098e-13	2.7994e-15	1.0674e-14	4.2358e-16	3.4788e-15	2.2319e-15	1.7121e-14	4.4604e-15	5.6236e-14	1.7974e-14	4.5094e-15	0	2.1726e-15	1.8992e-15	3.1152e-16	1.8769e-13	3.4211e-14	2.8851e-16	3.0956e-14	3.3026e-16	2.5836e-14	2.4724e-16
Other land - Grazing-Meat animals nec	EQ Land Occupation - TR -Pasture	PDF*yr/m2	3.8824e-15	3.983e-16	3.2649e-15	2.004e-15	2.3325e-15	1.5856e-13	2.1491e-15	4.323e-15	1.9537e-15	2.166e-14	3.3769e-16	1.5856e-13	0	1.6326e-15	4.4701e-15	1.6613e-15	5.706e-15	2.0971e-14	6.7176e-14	1.1743e-14	1.1403e-15	1.1351e-14	8.2954e-15	8.5192e-15	2.244e-16	1.098e-13	2.7994e-15	1.0674e-14	4.2358e-16	3.4788e-15	2.2319e-15	1.7121e-14	4.4604e-15	5.6236e-14	1.7974e-14	4.5094e-15	0	2.1726e-15	1.8992e-15	3.1152e-16	1.8769e-13	3.4211e-14	2.8851e-16	3.0956e-14	3.3026e-16	2.5836e-14	2.4724e-16
Other land - Grazing-Raw milk	EQ Land Occupation - TR -Pasture	PDF*yr/m2	3.8824e-15	3.983e-16	3.2649e-15	2.004e-15	2.3325e-15	1.5856e-13	2.1491e-15	4.323e-15	1.9537e-15	2.166e-14	3.3769e-16	1.5856e-13	0	1.6326e-15	4.4701e-15	1.6613e-15	5.706e-15	2.0971e-14	6.7176e-14	1.1743e-14	1.1403e-15	1.1351e-14	8.2954e-15	8.5192e-15	2.244e-16	1.098e-13	2.7994e-15	1.0674e-14	4.2358e-16	3.4788e-15	2.2319e-15	1.7121e-14	4.4604e-15	5.6236e-14	1.7974e-14	4.5094e-15	0	2.1726e-15	1.8992e-15	3.1152e-16	1.8769e-13	3.4211e-14	2.8851e-16	3.0956e-14	3.3026e-16	2.5836e-14	2.4724e-16
Cropland - Crops nec	EQ Land Occupation - TR - Permanent crop	PDF*yr/m2	4.5947e-15	4.5011e-16	4.5821e-15	4.3453e-16	2.8268e-15	1.6249e-13	2.7751e-15	9.1462e-15	2.8324e-15	2.2863e-14	3.5088e-16	1.6249e-13	0	2.0764e-15	4.8848e-15	2.8834e-15	6.8928e-15	2.6852e-14	1.1988e-13	1.5274e-14	1.6058e-15	1.0175e-14	9.7781e-15	1.8494e-14	4.6084e-16	1.2692e-13	1.3531e-15	2.0944e-14	4.7917e-16	5.1267e-15	2.6168e-15	2.8172e-14	6.2472e-15	7.5715e-14	1.8971e-14	1.2904e-14	0	2.6304e-15	2.3422e-15	4.3106e-16	1.6249e-13	3.6579e-14	3.902e-16	5.0579e-14	3.5228e-16	3.1344e-14	3.215e-16
Cropland - Fodder crops-Pigs	EQ Land Occupation - TR - Permanent crop	PDF*yr/m2	4.5947e-15	4.5011e-16	4.5821e-15	4.3453e-16	2.8268e-15	1.6249e-13	2.7751e-15	9.1462e-15	2.8324e-15	2.2863e-14	3.5088e-16	1.6249e-13	0	2.0764e-15	4.8848e-15	2.8834e-15	6.8928e-15	2.6852e-14	1.1988e-13	1.5274e-14	1.6058e-15	1.0175e-14	9.7781e-15	1.8494e-14	4.6084e-16	1.2692e-13	1.3531e-15	2.0944e-14	4.7917e-16	5.1267e-15	2.6168e-15	2.8172e-14	6.2472e-15	7.5715e-14	1.8971e-14	1.2904e-14	0	2.6304e-15	2.3422e-15	4.3106e-16	1.6249e-13	3.6579e-14	3.902e-16	5.0579e-14	3.5228e-16	3.1344e-14	3.215e-16
Cropland - Fodder crops-Cattle	EQ Land Occupation - TR - Permanent crop	PDF*yr/m2	4.5947e-15	4.5011e-16	4.5821e-15	4.3453e-16	2.8268e-15	1.6249e-13	2.7751e-15	9.1462e-15	2.8324e-15	2.2863e-14	3.5088e-16	1.6249e-13	0	2.0764e-15	4.8848e-15	2.8834e-15	6.8928e-15	2.6852e-14	1.1988e-13	1.5274e-14	1.6058e-15	1.0175e-14	9.7781e-15	1.8494e-14	4.6084e-16	1.2692e-13	1.3531e-15	2.0944e-14	4.7917e-16	5.1267e-15	2.6168e-15	2.8172e-14	6.2472e-15	7.5715e-14	1.8971e-14	1.2904e-14	0	2.6304e-15	2.3422e-15	4.3106e-16	1.6249e-13	3.6579e-14	3.902e-16	5.0579e-14	3.5228e-16	3.1344e-14	3.215e-16
Cropland - Fodder crops-Meat animals nec	EQ Land Occupation - TR - Permanent crop	PDF*yr/m2	4.5947e-15	4.5011e-16	4.5821e-15	4.3453e-16	2.8268e-15	1.6249e-13	2.7751e-15	9.1462e-15	2.8324e-15	2.2863e-14	3.5088e-16	1.6249e-13	0	2.0764e-15	4.8848e-15	2.8834e-15	6.8928e-15	2.6852e-14	1.1988e-13	1.5274e-14	1.6058e-15	1.0175e-14	9.7781e-15	1.8494e-14	4.6084e-16	1.2692e-13	1.3531e-15	2.0944e-14	4.7917e-16	5.1267e-15	2.6168e-15	2.8172e-14	6.2472e-15	7.5715e-14	1.8971e-14	1.2904e-14	0	2.6304e-15	2.3422e-15	4.3106e-16	1.6249e-13	3.6579e-14	3.902e-16	5.0579e-14	3.5228e-16	3.1344e-14	3.215e-16
Cropland - Fodder crops-Poultry	EQ Land Occupation - TR - Permanent crop	PDF*yr/m2	4.5947e-15	4.5011e-16	4.5821e-15	4.3453e-16	2.8268e-15	1.6249e-13	2.7751e-15	9.1462e-15	2.8324e-15	2.2863e-14	3.5088e-16	1.6249e-13	0	2.0764e-15	4.8848e-15	2.8834e-15	6.8928e-15	2.6852e-14	1.1988e-13	1.5274e-14	1.6058e-15	1.0175e-14	9.7781e-15	1.8494e-14	4.6084e-16	1.2692e-13	1.3531e-15	2.0944e-14	4.7917e-16	5.1267e-15	2.6168e-15	2.8172e-14	6.2472e-15	7.5715e-14	1.8971e-14	1.2904e-14	0	2.6304e-15	2.3422e-15	4.3106e-16	1.6249e-13	3.6579e-14	3.902e-16	5.0579e-14	3.5228e-16	3.1344e-14	3.215e-16
Cropland - Fodder crops-Raw milk	EQ Land Occupation - TR - Permanent crop	PDF*yr/m2	4.5947e-15	4.5011e-16	4.5821e-15	4.3453e-16	2.8268e-15	1.6249e-13	2.7751e-15	9.1462e-15	2.8324e-15	2.2863e-14	3.5088e-16	1.6249e-13	0	2.0764e-15	4.8848e-15	2.8834e-15	6.8928e-15	2.6852e-14	1.1988e-13	1.5274e-14	1.6058e-15	1.0175e-14	9.7781e-15	1.8494e-14	4.6084e-16	1.2692e-13	1.3531e-15	2.0944e-14	4.7917e-16	5.1267e-15	2.6168e-15	2.8172e-14	6.2472e-15	7.5715e-14	1.8971e-14	1.2904e-14	0	2.6304e-15	2.3422e-15	4.3106e-16	1.6249e-13	3.6579e-14	3.902e-16	5.0579e-14	3.5228e-16	3.1344e-14	3.215e-16
Cropland - Oil seeds	EQ Land Occupation - TR - Permanent crop	PDF*yr/m2	4.5947e-15	4.5011e-16	4.5821e-15	4.3453e-16	2.8268e-15	1.6249e-13	2.7751e-15	9.1462e-15	2.8324e-15	2.2863e-14	3.5088e-16	1.6249e-13	0	2.0764e-15	4.8848e-15	2.8834e-15	6.8928e-15	2.6852e-14	1.1988e-13	1.5274e-14	1.6058e-15	1.0175e-14	9.7781e-15	1.8494e-14	4.6084e-16	1.2692e-13	1.3531e-15	2.0944e-14	4.7917e-16	5.1267e-15	2.6168e-15	2.8172e-14	6.2472e-15	7.5715e-14	1.8971e-14	1.2904e-14	0	2.6304e-15	2.3422e-15	4.3106e-16	1.6249e-13	3.6579e-14	3.902e-16	5.0579e-14	3.5228e-16	3.1344e-14	3.215e-16
Cropland - Plant-based fibers	EQ Land Occupation - TR - Permanent crop	PDF*yr/m2	4.5947e-15	4.5011e-16	4.5821e-15	4.3453e-16	2.8268e-15	1.6249e-13	2.7751e-15	9.1462e-15	2.8324e-15	2.2863e-14	3.5088e-16	1.6249e-13	0	2.0764e-15	4.8848e-15	2.8834e-15	6.8928e-15	2.6852e-14	1.1988e-13	1.5274e-14	1.6058e-15	1.0175e-14	9.7781e-15	1.8494e-14	4.6084e-16	1.2692e-13	1.3531e-15	2.0944e-14	4.7917e-16	5.1267e-15	2.6168e-15	2.8172e-14	6.2472e-15	7.5715e-14	1.8971e-14	1.2904e-14	0	2.6304e-15	2.3422e-15	4.3106e-16	1.6249e-13	3.6579e-14	3.902e-16	5.0579e-14	3.5228e-16	3.1344e-14	3.215e-16
Cropland - Vegetables, fruit, nuts	EQ Land Occupation - TR - Permanent crop	PDF*yr/m2	4.5947e-15	4.5011e-16	4.5821e-15	4.3453e-16	2.8268e-15	1.6249e-13	2.7751e-15	9.1462e-15	2.8324e-15	2.2863e-14	3.5088e-16	1.6249e-13	0	2.0764e-15	4.8848e-15	2.8834e-15	6.8928e-15	2.6852e-14	1.1988e-13	1.5274e-14	1.6058e-15	1.0175e-14	9.7781e-15	1.8494e-14	4.6084e-16	1.2692e-13	1.3531e-15	2.0944e-14	4.7917e-16	5.1267e-15	2.6168e-15	2.8172e-14	6.2472e-15	7.5715e-14	1.8971e-14	1.2904e-14	0	2.6304e-15	2.3422e-15	4.3106e-16	1.6249e-13	3.6579e-14	3.902e-16	5.0579e-14	3.5228e-16	3.1344e-14	3.215e-16
Other land - Wood fuel	EQ Land Occupation - TR - Forest, intensive	PDF*yr/m2	2.2756e-15	1.7941e-16	2.7382e-15	1.097e-15	1.5139e-15	5.1148e-14	2.1574e-15	7.3638e-15	6.9158e-16	1.5713e-14	2.2213e-16	6.0396e-14	0	4.2214e-15	3.0939e-15	1.241e-15	4.1518e-15	1.5928e-14	6.5247e-13	6.8633e-15	2.4068e-16	4.6165e-15	5.0949e-15	4.5769e-15	1.8013e-16	4.1089e-15	1.8873e-15	9.5533e-15	3.6348e-16	2.9052e-15	1.5477e-15	8.3579e-15	3.1985e-15	2.8035e-14	8.1671e-15	6.984e-15	0	1.3917e-15	1.3023e-15	5.6545e-16	8.0964e-14	8.9102e-15	2.2763e-16	7.0202e-15	6.1743e-16	2.1912e-14	1.8648e-16
Other land - Grazing	EQ Land Occupation - TR -Pasture	PDF*yr/m2	3.8824e-15	3.983e-16	3.2649e-15	2.004e-15	2.3325e-15	1.5856e-13	2.1491e-15	4.323e-15	1.9537e-15	2.166e-14	3.3769e-16	1.5856e-13	0	1.6326e-15	4.4701e-15	1.6613e-15	5.706e-15	2.0971e-14	6.7176e-14	1.1743e-14	1.1403e-15	1.1351e-14	8.2954e-15	8.5192e-15	2.244e-16	1.098e-13	2.7994e-15	1.0674e-14	4.2358e-16	3.4788e-15	2.2319e-15	1.7121e-14	4.4604e-15	5.6236e-14	1.7974e-14	4.5094e-15	0	2.1726e-15	1.8992e-15	3.1152e-16	1.8769e-13	3.4211e-14	2.8851e-16	3.0956e-14	3.3026e-16	2.5836e-14	2.4724e-16
Other land - Marginal use	EQ Land Occupation - TR - Forest, Extensive	PDF*yr/m2	9.3987e-16	9.8561e-17	1.3941e-15	4.7653e-16	7.1798e-16	1.6835e-14	8.3741e-16	3.0636e-15	8.6236e-16	5.3299e-15	8.9093e-17	1.8656e-14	0	3.6474e-16	1.6981e-15	6.3232e-16	2.9623e-15	8.014e-15	1.9075e-13	3.3703e-15	4.7361e-16	1.7824e-15	2.3707e-15	2.6555e-15	8.9293e-17	1.6583e-15	9.147e-16	3.2558e-15	1.635e-16	7.961e-16	8.5918e-16	5.6068e-15	1.6233e-15	2.5677e-14	2.91e-15	3.3697e-15	0	6.1532e-16	6.4053e-16	1.3317e-16	2.3314e-14	5.2263e-15	1.0616e-16	1.0359e-14	2.6606e-16	7.194e-15	8.5693e-17
Infrastructure land	EQ Land Occupation - TR - Urban	PDF*yr/m2	4.4803e-15	5.0069e-16	3.1924e-15	4.1732e-16	4.0073e-15	2.7064e-13	1.9693e-15	1.4137e-14	2.308e-15	3.628e-14	3.5946e-16	2.7591e-13	0	2.1028e-15	4.947e-15	1.9512e-15	6.3485e-15	1.6502e-14	1.1594e-13	1.2065e-14	1.3785e-15	9.7917e-15	8.7022e-15	4.7515e-15	5.4007e-16	1.1447e-14	4.353e-15	2.0842e-14	3.3122e-16	5.3715e-15	3.1617e-15	3.5112e-14	5.1286e-15	3.4988e-14	1.9041e-14	1.5505e-14	0	2.4436e-15	2.0159e-15	3.5794e-16	3.4809e-13	3.4759e-14	3.4922e-16	4.2357e-14	2.7531e-16	2.592e-14	2.9435e-16
[truncated: 145 more columns]
