# Supplementary material for: Terrestrial Biodiversity Impacts of Replacing Beef with Novel Burger Patties across Ten European Union Countries
Source: Research Square preprint supplement (doi:10.21203/rs.3.rs-8056294/v1), 2026-01-08
Supplement: Supplementary file 32 [file S5-1 Sensitivity analysis.doc]

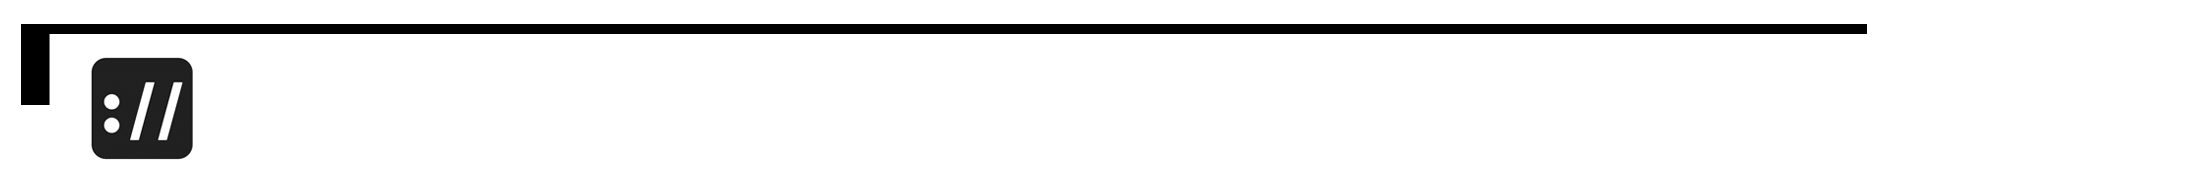


SUPPORTING INFORMATION FOR:

Zhang, Y., Rasul, K., Dorber, M., Stadler, K., Hertwich, E. G., Verones, F. Terrestrial Biodiversity Impacts of Replacing Beef with Novel Burger Patties across Ten European Union Countries. *Journal of* Industrial *Ecology.*


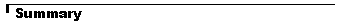


This Supporting Information provides detailed descriptions of the sensitivity analyses conducted in this study, covering the allocation method, functional unit (FU), and beef patty composition.


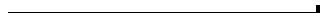


**Sensitivity Analysis**

Sensitivity analyses were conducted to assess the robustness of results against key methodological assumptions, including allocation method, functional unit (FU), and beef patty composition.

**Allocation method**

As appropriate bulk price data for economic allocation were unavailable, a mass-based allocation approach was applied throughout the study. To assess its influence, sensitivity analyses were conducted by varying the mass-based allocation ratios for key ingredients under two contrasting scenarios:

1. **High-case scenario**, where the key ingredients were assigned higher mass shares; and
2. **Low-case scenario**, where lower mass shares were applied.

The results indicated that varying the mass-based allocation ratios did not alter the identification of the soy patty as the best-performing novel option. Under the low-case scenario, rankings remained identical to the baseline: soy patties performed best, while pea patties showed the highest biodiversity impacts among novel options—except in Spain, Greece, and Italy, where mycoprotein (MP) patties ranked worst. Pea patties also exceeded beef in biodiversity impacts in the Czech Republic, Germany, Belgium, and Poland. Under the high-case scenario, overall patterns were consistent with both the baseline and low-case scenarios, except that in two additional countries (the Netherlands and Spain), the worst-performing patty shifted from pea to MP, driven by increased impact from pea protein and molasses.

**Functional unit (FU)**

The baseline FU was defined as one raw burger patty (113 g per serving), consistent with Smetana et al. (2021). To test the effect of alternative FUs, two additional scenarios were considered:

(1) **Protein-based FU**, defined as 20.3 g protein (equivalent to the protein content of a 113 g beef patty); and
(2) **Energy-based FU**, defined as 266 kcal (equivalent to the caloric content of a 113 g beef patty).

For the **protein-based FU**, the required serving sizes were adjusted to achieve equal protein content: 113 g for pea patties, 145.2 g for soy patties, and 96.8 g for insect and MP patties. Results under this scenario were identical to the baseline.
For the **energy-based FU**, serving sizes were adjusted to 129.1 g for pea, 157.4 g for soy, 135 g for insect, and 122 g for MP patties. Under this scenario, insect patties became the best-performing novel option in Belgium, Germany, and Poland, owing to the relatively low caloric density of soy patties. The analytical results for others remained unchanged.

**Beef patty composition**

In the baseline scenario, the beef patty was modeled as a mixture of bovine meat and potato starch. A sensitivity analysis was conducted to evaluate the effect of varying the proportion of bovine meat to 100%. The results showed that assuming a 100% bovine meat composition did not alter the relative ranking of the patties.

Overall, the sensitivity analysis results confirm that the study’s conclusions are robust to methodological choices regarding allocation, functional unit definition, and product composition (see Supporting Information S5-2 for details).
