# Supplementary material for: Terrestrial Biodiversity Impacts of Replacing Beef with Novel Burger Patties across Ten European Union Countries
Source: Research Square preprint supplement (doi:10.21203/rs.3.rs-8056294/v1), 2026-01-08
Supplement: Supplementary file 35 [file S5-2 Sensitivity analysis results summary.xlsx]

## Sheet: CoverSheet
Journal of Industrial Ecology – www.wileyonlinelibrary.com/journal/jie
SUPPORTING INFORMATION FOR:
Zhang, Y., Rasul, K., Dorber, M., Stadler, K., Hertwich, E. G., Verones, F.Terrestrial Biodiversity Impacts of Replacing Beef with Novel Burger Patties across Ten European Union Countries. Journal of Industrial Ecology.
This Supporting Information provides the analytical results on the sensitivity analyses of the allocation method, functional unit, and beef patty composition in this study.
The file contains the following information:
Sheet name	Description
S5-2-1	Sensitivity analysis results of mass-based allocation for key ingredients under two conditions: (1) high-case (key ingredients with a higher mass share), and (2) low-case scenarios(key ingredients with a lower mass share).
S5-2-2	Comprehensive mass-based allocation information, including by-products and underlying assumptions.
S5-2-3	Sensitivity analysis for alternative functional units: (1) 20.3 g protein per burger patty; (2) 266 kcal per burger patty.
S5-2-4	Sensitivity analysis results for alternative beef burger composition:100% bovine meat

## Sheet: S5-1
Mass-based allocation information for 1) higher case and 2) lower case
	Mass Share %			allocation coefficient
	Baseline	Higher case	Lower case	Baseline	Higher case	Lower case	Comments(burger patties estimation)
Soy for' Soy protein concentrate' (Soy burger)	39	49	29	1	1.25641	0.74359	protein cotent 70%
Pea for "Pea protein concentrate' (Pea burger)	10	15	5	1	1.5	0.5	protein cotent 55%, with dry fractiion for protein extraction
Pea for "Pea protein isolate' (Pea burger)	20	30	10	1	1.5	0.5	protein cotent 90%
Egg for 'Egg protein' (Insect burger)	16	20	8	2	1.25	0.5	protein content 80%, produced from Egg white
Sugar beet for 'Molasse' (Mycoprotein burger)	9	17	6	2.25	1.88889	0.666667	Molasses from sugar beet, by-product of sugar production
Mass-based allocation results
	Higher case (key ingredients with a higher mass share)
Land-driven Biodiversity (Unit: PDF*yr per patty)		Belgium	Czech Republic	France	Germany	Greece	Italy	Netherlands	Poland	Romania	Spain
	insect	8.56e-16	5.46e-16	8.53e-16	5.80e-16	2.31e-15	1.39e-15	8.61e-16	3.16e-16	4.63e-16	2.61e-15
	pea	2.29e-15	1.95e-15	1.88e-15	1.96e-15	2.49e-15	2.32e-15	2.10e-15	1.75e-15	1.66e-15	3.84e-15
	quorn	1.79e-15	1.90e-15	1.95e-15	1.62e-15	4.81e-15	4.35e-15	2.15e-15	1.49e-15	1.60e-15	5.21e-15
	soy	5.84e-16	2.63e-16	4.89e-16	4.51e-16	4.93e-16	5.27e-16	5.22e-16	2.36e-16	2.24e-16	6.85e-16
	beef	1.83e-15	1.58e-15	2.97e-15	1.57e-15	1.22e-14	1.08e-14	3.91e-15	8.64e-16	1.84e-15	2.18e-14
Further analysis	Best patty type	soy	soy	soy	soy	soy	soy	soy	soy	soy	soy
	Worst patty type	pea	pea	beef	pea	beef	beef	beef	pea	beef	beef
	Worst novel patty	pea	pea	quorn	pea	quorn	quorn	quorn	pea	pea	quorn
	Lower case (key ingredients with a lower mass share)
Land-driven Biodiversity (Unit: PDF*yr per patty)		Belgium	Czech Republic	France	Germany	Greece	Italy	Netherlands	Poland	Romania	Spain
	insect	8.06e-16	5.05e-16	7.91e-16	5.25e-16	2.25e-15	1.33e-15	8.00e-16	2.76e-16	4.27e-16	2.55e-15
	pea	2.07e-15	1.80e-15	1.69e-15	1.87e-15	1.98e-15	2.10e-15	1.94e-15	1.69e-15	1.50e-15	2.74e-15
	quorn	1.49e-15	1.56e-15	1.50e-15	1.43e-15	2.71e-15	2.63e-15	1.66e-15	1.38e-15	1.31e-15	3.02e-15
	soy	4.81e-16	1.72e-16	3.48e-16	3.27e-16	3.79e-16	3.87e-16	3.86e-16	1.47e-16	1.49e-16	5.35e-16
	beef	1.83e-15	1.58e-15	2.97e-15	1.57e-15	1.22e-14	1.08e-14	3.91e-15	8.64e-16	1.84e-15	2.18e-14
Further analysis	Best patty type	soy	soy	soy	soy	soy	soy	soy	soy	soy	soy
	Worst patty type	pea	pea	beef	pea	beef	beef	beef	pea	beef	beef
	Worst novel patty	pea	pea	pea	pea	quorn	quorn	pea	pea	pea	quorn

## Sheet: S5-2
Baseline									Higher case						Lower case
Pea protein concentrate (Pea burger)		Yield (g/100g Pea)	Mass share % (only useful part)	Comments	Reference link	allocation coefficient		Pea protein concentrate (Pea burger)		Mass share % (only useful part)	Comments	Reference link		Pea protein concentrate (Pea burger)		Mass share % (only useful part)	Comments	Reference link
	PPC (46% protein)-dry fractiion	10	0.113636	assue applying dry fraction	https://www.sciencedirect.com/science/article/pii/S0959652623023314	1			PPC (46% protein)-dry fractiion	0.16		https://www.sciencedirect.com/science/article/pii/S0959652623023314			PPC (46% protein)-dry fractiion	0.06		https://www.sciencedirect.com/science/article/pii/S0959652623023314
	Pea Starch	21	0.238636						Pea Starch	0.22					Pea Starch	0.26
	Pea Fiber	57	0.647727						Pea Fiber	0.62					Pea Fiber and others	0.68
	Water or others (evaporated)	12
Soy protein concentrate (Soy burger)		Yield (g/100g soy bean)	Mass share % (only useful part)	Comments	Reference link	allocation coefficient		Soy protein concentrate (Soy burger)		Mass share % (only useful part)	Comments	Reference link		Soy protein concentrate (Soy burger)		Mass share % (only useful part)	Comments	Reference link
	SPC( 70% protein)	38.5714	0.385714	soybean's protein content is: 36%, with SPC protein content 70%, assueme 75% Extraction ratio，	https://www.fao.org/4/t0532e/t0532e06.htm?utm_source=chatgpt.com	1			SPC( 70% protein)	0.49	soybean's protein content is: 36%, with SPC protein content 70%, assueme 75% Extraction ratio，	https://www.fao.org/4/t0532e/t0532e06.htm?utm_source=chatgpt.com			SPC( 70% protein)	0.29	soybean's protein content is: 36%, with SPC protein content 70%, assueme 75% Extraction ratio，	https://www.fao.org/4/t0532e/t0532e06.htm?utm_source=chatgpt.com
	Soy oil	20	0.2						Soy oil	0.15					Soy oil	0.25
	Other by-products (fiber, carbs, residual protein)	61	0.61						Other by-products (fiber, carbs, residual protein)	0.36					Other by-products (fiber, carbs, residual protein)	0.46
Pea protein Isolate (Pea burger)		Yield (g/100g Pea)	Mass share % (only useful part)	Comments	Reference link	allocation coefficient		Pea protein Isolate (Pea burger)		Mass share % (only useful part)	Comments	Reference link		Pea protein Isolate (Pea burger)		Mass share % (only useful part)	Comments	Reference link
	PPI (90% protein)-wet fractiion	19.1667	0.197256	Assume 75% extraction ratio, pea ptotein content:23%		1			PPI (90% protein)-wet fractiion	0.3	Assume 75% extraction ratio, pea ptotein content:23%				PPI (90% protein)-wet fractiion	0.1	Assume 75% extraction ratio, pea ptotein content:23%
	Pea Starch	21	0.216123						Pea Starch	0.16					Pea Starch	0.27
	Pea Fiber	57	0.586621						Pea Fiber	0.54					Pea Fiber	0.63
	Water or others (evaporated)	2.83333
Molasses (MP burger)		Yield (kg/1000 kg beet)	Mass share % (only useful part)	Comments	Reference link	allocation coefficient		Molasses (MP burger)		Mass share % (only useful part)	Comments	Reference link		Molasses (MP burger)		Mass share % (only useful part)	Comments	Reference link
	Sugar	150	0.340909	Assume 1t beet produce 150kg sugar, 40kg molasses, and 250kg beet pulp (Wet)	https://www.mdpi.com/2227-9717/12/8/1606?utm_source=chatgpt.com	2.25			Sugar	0.625	Assume 1t beet produce 150kg sugar, 40kg molasses, and 50kg beet pulp (Dry)	https://www.mdpi.com/2227-9717/12/8/1606?utm_source=chatgpt.com			Sugar	0.217391	Assume 1t beet produce 150kg sugar, 40kg molasses, and 500kg beet pulp (wet)	https://www.mdpi.com/2227-9717/12/8/1606?utm_source=chatgpt.com
	Molasses	40	0.0909091		https://www.feedipedia.org/node/711?utm_source=chatgpt.com				Molasses	0.166667		https://www.feedipedia.org/node/711?utm_source=chatgpt.com			Molasses	0.057971		https://www.feedipedia.org/node/711?utm_source=chatgpt.com
	Beet pulp, wet	250	0.568182		https://www.mdpi.com/2227-9717/12/8/1606?utm_source=chatgpt.com				Beet pulp, dry	0.208333		https://www.feedipedia.org/node/24378?utm_source			Beet pulp, wet	0.724638		https://www.feedipedia.org/node/710?utm_source=chatgpt.com
	water	560							water						water
Egg protein (Insect burger)		Yield (g/100g egg)	Mass share % (only useful part)	Comments	Reference link	allocation coefficient		Egg protein (Insect burger)		Mass share % (only useful part)	Comments	Reference link		Egg protein (Insect burger)		Mass share % (only useful part)	Comments	Reference link
	Egg white protein powder (with 80% protein)	7.5	0.159574	assume 10% protein in egg white		2			Egg white protein powder (with 80% protein)	0.2					Egg white protein powder (with 80% protein)	0.08
	Egg yolk	30	0.638298						Egg yolk	0.8					Egg yolk	0.92
	Eggshell	10	0.212766						Eggshell						Eggshell
	Water or others (evaporated)	53							Water or others (evaporated)						Water or others (evaporated)

## Sheet: S5-3
Functional Unit: 20.3g prtein of raw burger patty
	MP	beef	insect	pea	soy	Best novel burger	Worst novel burger	Worst burger
Belgium	1.38e-15	1.83e-15	7.13e-16	2.18e-15	6.85e-16	soy	pea	pea
Czech Republic	1.44e-15	1.58e-15	4.50e-16	1.88e-15	2.80e-16	soy	pea	pea
France	1.41e-15	2.97e-15	7.05e-16	1.78e-15	5.38e-16	soy	pea	beef
Germany	1.28e-15	1.57e-15	4.74e-16	1.91e-15	5.00e-16	soy	pea	pea
Greece	2.86e-15	1.22e-14	1.95e-15	2.24e-15	5.61e-16	soy	MP	beef
Italy	2.66e-15	1.08e-14	1.17e-15	2.21e-15	5.87e-16	soy	MP	beef
Netherlands	1.55e-15	3.91e-15	7.12e-16	2.02e-15	5.84e-16	soy	pea	beef
Poland	1.22e-15	8.64e-16	2.54e-16	1.72e-15	2.46e-16	soy	pea	pea
Romania	1.21e-15	1.84e-15	3.82e-16	1.58e-15	2.39e-16	soy	pea	beef
Spain	3.24e-15	2.18e-14	2.21e-15	3.29e-15	7.84e-16	soy	MP	beef
Functional Unit: 266kcal of raw burger patty
	MP	beef	insect	pea	soy	Best novel burger	Worst novel burger	Worst burger
Belgium	1.48e-15	1.83e-15	6.94e-16	1.91e-15	7.42e-16	insect	pea	pea
Czech Republic	1.55e-15	1.58e-15	4.38e-16	1.64e-15	3.03e-16	soy	pea	pea
France	1.52e-15	2.97e-15	6.86e-16	1.56e-15	5.83e-16	soy	pea	beef
Germany	1.38e-15	1.57e-15	4.61e-16	1.67e-15	5.42e-16	insect	pea	pea
Greece	3.08e-15	1.22e-14	1.90e-15	1.96e-15	6.07e-16	soy	MP	beef
Italy	2.87e-15	1.08e-14	1.13e-15	1.94e-15	6.36e-16	soy	MP	beef
Netherlands	1.68e-15	3.91e-15	6.93e-16	1.77e-15	6.32e-16	soy	pea	beef
Poland	1.31e-15	8.64e-16	2.47e-16	1.50e-15	2.67e-16	insect	pea	pea
Romania	1.30e-15	1.84e-15	3.71e-16	1.38e-15	2.59e-16	soy	pea	beef
Spain	3.49e-15	2.18e-14	2.15e-15	2.88e-15	8.50e-16	soy	MP	beef

## Sheet: S5-4
	Belgium	Czech Republic	France	Germany	Greece	Italy	Netherlands	Poland	Romania	Spain
MP	1.61e-15	1.68e-15	1.64e-15	1.49e-15	3.33e-15	3.11e-15	1.81e-15	1.42e-15	1.41e-15	3.78e-15
beef	1.83e-15	1.59e-15	2.98e-15	1.58e-15	1.22e-14	1.08e-14	3.93e-15	8.70e-16	1.85e-15	2.18e-14
insect	8.32e-16	5.25e-16	8.23e-16	5.53e-16	2.28e-15	1.36e-15	8.31e-16	2.96e-16	4.45e-16	2.58e-15
pea	2.18e-15	1.88e-15	1.78e-15	1.91e-15	2.24e-15	2.21e-15	2.02e-15	1.72e-15	1.58e-15	3.29e-15
soy	5.33e-16	2.18e-16	4.18e-16	3.89e-16	4.36e-16	4.57e-16	4.54e-16	1.91e-16	1.86e-16	6.10e-16
Best patty type	soy	soy	soy	soy	soy	soy	soy	soy	soy	soy
Worst patty type	pea	pea	beef	pea	beef	beef	beef	pea	beef	beef
Worst novel patty	pea	pea	pea	pea	quorn	quorn	pea	pea	pea	quorn
