# Supplementary material for: Terrestrial Biodiversity Impacts of Replacing Beef with Novel Burger Patties across Ten European Union Countries
Source: Research Square preprint supplement (doi:10.21203/rs.3.rs-8056294/v1), 2026-01-08
Supplement: Supplementary file 38 [file c7ffae5158f329f23562c40f.xlsx]

## Sheet: CoverSheet
Journal of Industrial Ecology – www.wileyonlinelibrary.com/journal/jie
SUPPORTING INFORMATION FOR:
Zhang, Y., Rasul, K., Dorber, M., Stadler, K., Hertwich, E. G., Verones, F.Terrestrial Biodiversity Impacts of Replacing Beef with Novel Burger Patties across Ten European Union Countries. Journal of Industrial Ecology. Journal of Industrial Ecology.
This Supporting Information summarizes results on land use footprints, land‑ and climate‑driven biodiversity impacts, and combined terrestrial impacts for novel patties. The results are disaggregated by land use and GHG types, major ingredients, sourcing regions, and system boundaries. Additional information is provided on the land use intensity and biodiversity impacts of key ingredients. Detail…
data_from_Table S3-1 to S3-14 are used_in_manuscript
The file contains the following information:
Table:	Sheet Name:	Description:
Table S3-1	LU_by_type	Land use footprint (km²) split by land use types
Table S3-2	LDB_by_type	Land-driven biodiversity impact (PDF.yr) split by land use types
Table S3-3	CDB_by_GHG	Climate-driven biodiversity impact (PDF.yr) split by GHG types
Table S3-4	TerrBio_by_ImpCa	Terrestrial biodiversity impact per patty, including both land-driven and climate-driven contributions, along with their respective percentage shares.
Table S3-5	LU_by_ingr	Land use footprint (km²) split by major ingredients
Table S3-6	LDB_by_ingr	Terrestrial biodiversity impact (PDF.yr) split by major ingredients
Table S3-7	CDB_by_ingr	Climate-driven biodiversity impact (PDF.yr) split by major ingredients
Table S3-8	LU_by_region	Land use footprint (km²) split across the top three major sourcing regions and an aggregated category termed Others, covering all remaining regions
Table S3-9	LDB_by_region	Terrestrial biodiversity impact (PDF.yr) split across the top three major sourcing regions and an aggregated category termed Others, covering all remaining regions
Table S3-10	CDB_by_region	Climate-driven biodiversity impact (PDF.yr) split across the top three major sourcing regions and an aggregated category termed Others, covering all remaining regions
Table S3-11	Reduction_Beef2NB	Reduction in land use footprint and biodiversity Impact from transitioning from beef to novel burgers
Table S3-12	Land use intensity	Land use intensity (km²/ton) calculated from FABIO land use account for 2018 across major sourcing region
Table S3-13	KeyIngr_TerrBio	Biodiversity impacts of key burger ingredients, disaggregated by top three sourcing regions and an aggregated category termed Others, covering all remaining regions
Table S3-14	LDB_LU_by_SysBoundary	Terrestrial biodiversity impact (PDF.yr) and land use footprint (km²) disaggregated by system boundaries, indicating the portion associated with non-food systems.

## Sheet: S3-1 LU_by_type
		Land use footprint (Unit: km2 per patty)				Percentage of land use category
		Cropland	Forest area	Other land Use	pastures	Cropland %	pastures %	Forest area %	Other land Use %
Belgium	beef	4.55427e-07	5.90423e-08	1.10309e-08	3.33621e-07	0.530108	0.388329	0.068724	0.0128397
	insect	3.25287e-07	3.4166e-08	5.47868e-09	4.25903e-10	0.890325	0.00116572	0.0935139	0.0149954
	pea	2.42935e-07	1.08995e-08	1.55412e-09	8.15017e-23	0.951237	3.19128e-16	0.042678	0.00608532
	MP	2.88295e-07	1.19614e-08	1.67164e-09	1.73467e-20	0.954847	5.7453e-14	0.0396166	0.00553655
	soy	1.77004e-07	1.00911e-08	1.60861e-09	2.63621e-21	0.937999	1.39701e-14	0.053476	0.00852451
Czech Republic	beef	6.79589e-07	4.5868e-08	7.11882e-09	3.48454e-07	0.62865	0.322335	0.0424299	0.00658522
	insect	3.58559e-07	1.90241e-08	2.80291e-09	2.8554e-10	0.941912	0.000750096	0.0499751	0.00736308
	pea	2.91256e-07	4.90313e-09	4.61784e-10	1.42848e-23	0.981913	4.81585e-17	0.01653	0.00155681
	MP	4.14945e-07	5.70152e-09	5.50065e-10	4.95905e-23	0.985158	1.17737e-16	0.0135365	0.00130596
	soy	1.63071e-07	4.28175e-09	5.24757e-10	1.56306e-22	0.971369	9.31074e-16	0.0255053	0.00312584
France	beef	5.82363e-07	4.72078e-08	8.41184e-09	5.55837e-07	0.487815	0.465595	0.0395435	0.00704616
	insect	2.82173e-07	1.51705e-08	2.66561e-09	3.55465e-10	0.939435	0.00118344	0.050507	0.00887459
	pea	2.15544e-07	4.905e-09	5.79917e-10	1.07522e-23	0.975185	4.86462e-17	0.0221917	0.00262372
	MP	2.63633e-07	5.59963e-09	7.01118e-10	2.32671e-22	0.976658	8.61955e-16	0.0207444	0.00259737
	soy	1.45889e-07	4.88025e-09	9.25373e-10	6.17986e-23	0.961728	4.07388e-16	0.0321715	0.00610024
Germany	beef	5.29453e-07	4.15806e-08	6.31685e-09	2.74266e-07	0.621704	0.322053	0.0488256	0.00741749
	insect	2.35957e-07	2.08255e-08	3.34425e-09	2.92748e-10	0.906065	0.00112414	0.0799689	0.0128418
	pea	2.2638e-07	5.51333e-09	7.21977e-10	2.89687e-24	0.973195	1.24535e-17	0.0237015	0.00310374
	MP	2.72705e-07	6.41683e-09	8.33716e-10	2.3103e-22	0.974101	8.25237e-16	0.0229208	0.00297803
	soy	1.41878e-07	5.92152e-09	8.32756e-10	3.2319e-22	0.954557	2.17443e-15	0.0398401	0.0056028
Greece	beef	1.22037e-06	6.92263e-08	1.10101e-08	1.92139e-06	0.378762	0.596335	0.0214856	0.00341717
	insect	4.97236e-07	1.42499e-08	1.59034e-09	2.94393e-09	0.963598	0.00570507	0.027615	0.00308194
	pea	2.51753e-07	6.69492e-09	5.36172e-10	1.24517e-23	0.972079	4.80789e-17	0.0258507	0.00207029
	MP	4.86171e-07	6.98732e-09	5.9554e-10	1.98967e-22	0.984642	4.02969e-16	0.0141514	0.00120615
	soy	1.56135e-07	4.18394e-09	4.61807e-10	8.69839e-23	0.971105	5.41011e-16	0.0260227	0.00287228
Italy	beef	1.18089e-06	9.63633e-08	1.6719e-08	1.69121e-06	0.395585	0.566534	0.0322805	0.00560065
	insect	3.43063e-07	4.32373e-08	6.4231e-09	3.28953e-10	0.872818	0.000836917	0.110004	0.0163416
	pea	2.95302e-07	1.23186e-08	1.71763e-09	1.7641e-23	0.954625	5.70281e-17	0.0398224	0.0055526
	MP	5.18903e-07	1.45144e-08	1.99332e-09	1.71668e-22	0.969168	3.20628e-16	0.027109	0.00372298
	soy	1.31638e-07	1.25378e-08	1.88288e-09	3.00159e-22	0.901267	2.05506e-15	0.0858413	0.0128913
Netherlands	beef	8.47849e-07	9.73357e-08	1.73883e-08	6.28579e-07	0.532852	0.395046	0.0611731	0.0109281
	insect	2.84373e-07	3.17986e-08	5.45895e-09	4.19152e-10	0.88301	0.00130151	0.0987382	0.0169507
	pea	2.59535e-07	9.88995e-09	1.47118e-09	9.24859e-24	0.958061	3.41407e-17	0.0365082	0.00543078
	MP	2.99422e-07	1.05214e-08	1.54521e-09	2.6224e-21	0.961262	8.41892e-15	0.0337778	0.00496072
	soy	1.48475e-07	9.88048e-09	1.76297e-09	5.84436e-22	0.927282	3.65002e-15	0.0617073	0.0110104
Poland	beef	8.42084e-07	5.76275e-08	1.32446e-08	1.13154e-07	0.820657	0.110275	0.0561611	0.0129075
	insect	3.56494e-07	1.85009e-08	3.85487e-09	8.14379e-11	0.940788	0.000214915	0.048824	0.010173
	pea	2.46704e-07	6.03335e-09	9.53004e-10	5.84534e-24	0.972461	2.30412e-17	0.0237823	0.00375656
	MP	3.25583e-07	7.28551e-09	1.24244e-09	6.69687e-23	0.974476	2.00438e-16	0.0218056	0.00371864
	soy	1.49554e-07	4.74923e-09	8.1592e-10	2.08813e-22	0.964123	1.34615e-15	0.0306166	0.00525995
Romania	beef	1.04033e-06	3.74102e-08	4.5663e-09	1.51726e-07	0.843033	0.122951	0.0303153	0.0037003
	insect	3.76539e-07	1.09573e-08	1.03681e-09	7.16094e-11	0.968951	0.000184273	0.0281966	0.00266804
	pea	2.93187e-07	5.96692e-09	2.9926e-10	6.19784e-24	0.979075	2.06972e-17	0.0199261	0.000999356
	MP	3.97286e-07	5.70126e-09	3.10914e-10	8.03112e-23	0.985093	1.99136e-16	0.0141366	0.000770927
	soy	1.38657e-07	2.8074e-09	4.30835e-10	4.26117e-23	0.977179	3.00305e-16	0.0197851	0.0030363
Spain	beef	9.58539e-07	5.48377e-08	1.16719e-08	3.45136e-06	0.214131	0.771011	0.0122504	0.00260742
	insect	5.08e-07	2.05109e-08	5.14969e-09	2.08813e-09	0.948206	0.0038976	0.0382845	0.00961214
	pea	4.11408e-07	6.61772e-09	1.41591e-09	9.37043e-24	0.980847	2.23403e-17	0.0157774	0.00337571
	MP	5.27797e-07	6.97732e-09	1.40406e-09	1.97953e-22	0.984368	3.69193e-16	0.0130131	0.00261864
	soy	1.53807e-07	8.20444e-09	1.93567e-09	9.8473e-23	0.93815	6.0064e-16	0.0500433	0.0118067

## Sheet: S3-2 LDB_by_type
		Cropland	Forest area	Other land Use	pastures	Cropland %	pastures %	Forest area %	Other land Use %
Belgium	beef	1.0245e-15	1.96521e-16	4.08743e-17	5.66821e-16	0.560229	0.309955	0.107464	0.0223514
	insect	7.00878e-16	1.09868e-16	2.02979e-17	8.58299e-19	0.8425	0.00103173	0.132069	0.0243994
	pea	2.1409e-15	3.68684e-17	6.68019e-18	1.3305e-31	0.980064	6.09077e-17	0.0168777	0.00305807
	MP	1.5599e-15	3.89833e-17	6.55541e-18	4.53045e-30	0.971635	2.82195e-15	0.0242821	0.00408326
	soy	4.93475e-16	3.24105e-17	6.71319e-18	7.47047e-31	0.926542	1.40264e-15	0.0608535	0.0126046
Czech Republic	beef	9.87509e-16	1.03004e-16	1.72324e-17	4.76869e-16	0.623186	0.300937	0.0650027	0.0108748
	insect	4.68759e-16	4.78934e-17	8.37992e-18	2.87993e-19	0.89233	0.000548224	0.09117	0.015952
	pea	1.86418e-15	1.28142e-17	1.33696e-18	2.79189e-32	0.992466	1.48637e-17	0.00682214	0.000711778
	MP	1.65982e-15	1.41056e-17	1.53891e-18	5.11021e-32	0.990663	3.05002e-17	0.00841892	0.000918493
	soy	2.0612e-16	1.00224e-17	1.66727e-18	1.27898e-31	0.946331	5.87203e-16	0.0460146	0.00765469
France	beef	1.4924e-15	1.50165e-16	3.03148e-17	1.29308e-15	0.503176	0.435974	0.0506295	0.0102209
	insect	7.62842e-16	4.87562e-17	9.93462e-18	1.11538e-18	0.9273	0.00135585	0.0592674	0.0120764
	pea	1.76337e-15	1.6615e-17	2.14749e-18	1.64714e-32	0.989472	9.24254e-18	0.00932312	0.00120501
	MP	1.6237e-15	1.86159e-17	2.53626e-18	8.12197e-32	0.98714	4.93782e-17	0.0113177	0.00154194
	soy	3.9836e-16	1.62542e-17	3.7555e-18	4.99341e-32	0.952172	1.19354e-16	0.0388512	0.00897651
Germany	beef	9.47109e-16	1.2746e-16	2.05232e-17	4.78841e-16	0.601747	0.304232	0.0809816	0.0130394
	insect	4.8026e-16	6.04004e-17	1.13139e-17	6.25017e-19	0.869093	0.00113105	0.109302	0.0204739
	pea	1.89486e-15	1.63831e-17	2.36777e-18	5.15553e-33	0.990201	2.69414e-18	0.00856137	0.00123733
	MP	1.47393e-15	1.81922e-17	2.50581e-18	7.87555e-32	0.986152	5.26922e-17	0.0121717	0.00167654
	soy	3.6898e-16	1.68882e-17	3.24303e-18	2.65401e-31	0.948264	6.82069e-16	0.043402	0.00833446
Greece	beef	4.23692e-15	2.1915e-16	3.64666e-17	7.72251e-15	0.346861	0.632213	0.017941	0.00298539
	insect	2.22246e-15	4.02448e-17	5.47572e-18	1.2527e-17	0.974461	0.00549261	0.0176458	0.00240089
	pea	2.21165e-15	2.22354e-17	2.00549e-18	2.07023e-32	0.989158	9.25907e-18	0.00994476	0.000896956
	MP	3.31047e-15	2.13288e-17	1.98449e-18	1.53042e-31	0.993007	4.59064e-17	0.00639777	0.000595268
	soy	4.20156e-16	1.39912e-17	1.8039e-18	8.60972e-32	0.963769	1.97493e-16	0.0320934	0.00413785
Italy	beef	4.10546e-15	3.49523e-16	6.39314e-17	6.24067e-15	0.381563	0.58001	0.0324848	0.00594182
	insect	1.16602e-15	1.64939e-16	2.69568e-17	1.29802e-18	0.857864	0.00095498	0.121349	0.0198326
	pea	2.1632e-15	4.22424e-17	6.47253e-18	2.34755e-32	0.977976	1.06132e-17	0.0190976	0.00292621
	MP	3.04722e-15	5.12261e-17	7.73542e-18	2.34912e-31	0.981018	7.56271e-17	0.0164917	0.00249033
	soy	4.00131e-16	4.84072e-17	8.15486e-18	2.2809e-31	0.876149	4.99438e-16	0.105995	0.0178563
Netherlands	beef	2.02738e-15	3.42183e-16	6.48718e-17	1.47622e-15	0.518424	0.377487	0.0875001	0.0165885
	insect	7.02644e-16	1.07066e-16	2.01988e-17	1.02171e-18	0.845611	0.0012296	0.128851	0.0243086
	pea	1.98017e-15	3.34085e-17	5.53823e-18	1.50598e-32	0.980711	7.45857e-18	0.0165461	0.00274289
	MP	1.77331e-15	3.47466e-17	5.5567e-18	7.43972e-31	0.977777	4.10214e-16	0.0191587	0.00306387
	soy	4.13533e-16	3.35375e-17	7.08891e-18	2.93777e-31	0.910546	6.46857e-16	0.0738452	0.0156088
Poland	beef	6.28516e-16	8.00273e-17	1.33205e-17	1.42068e-16	0.727506	0.164444	0.0926315	0.0154184
	insect	2.58355e-16	3.24034e-17	5.51876e-18	9.45632e-20	0.871726	0.000319069	0.109334	0.0186211
	pea	1.70016e-15	1.51854e-17	1.52137e-18	1.13394e-32	0.990269	6.6047e-18	0.0088448	0.000886132
	MP	1.40321e-15	1.66869e-17	1.85557e-18	3.79058e-32	0.986958	2.66614e-17	0.0117369	0.00130513
	soy	1.79427e-16	1.02184e-17	1.77371e-18	1.74298e-31	0.937352	9.10557e-16	0.0533821	0.00926607
Romania	beef	1.34647e-15	6.84002e-17	1.11434e-17	4.12996e-16	0.732171	0.224576	0.0371941	0.00605945
	insect	4.24478e-16	1.75508e-17	2.90642e-18	1.93907e-19	0.953606	0.000435619	0.0394285	0.00652939
	pea	1.55662e-15	1.9891e-17	1.0597e-18	5.88923e-33	0.98672	3.73309e-18	0.0126086	0.000671729
	MP	1.39232e-15	1.74499e-17	1.02435e-18	1.46715e-31	0.986905	1.03995e-16	0.0123689	0.000726079
	soy	1.77658e-16	6.91616e-18	1.63604e-18	6.95696e-32	0.954072	3.73609e-16	0.0371417	0.008786
Spain	beef	4.0011e-15	1.89947e-16	4.27624e-17	1.75534e-14	0.183644	0.805675	0.00871825	0.00196273
	insect	2.47993e-15	7.15491e-17	1.94067e-17	9.99402e-18	0.960886	0.00387233	0.0277228	0.0075194
	pea	3.26309e-15	2.19318e-17	5.20527e-18	1.55122e-32	0.991752	4.71463e-18	0.00666573	0.00158204
	MP	3.7533e-15	2.26777e-17	5.02898e-18	2.0785e-31	0.992672	5.49722e-17	0.00599779	0.00133006
	soy	5.72889e-16	2.94857e-17	7.76268e-18	1.01114e-31	0.938951	1.65724e-16	0.0483263	0.0127228
Unit: PDF* yr per patty

## Sheet: S3-3 CDB_by_GHG
		CH4	CO2	N2O	SF6
Belgium	beef	2.12577e-17	6.83658e-18	2.80943e-17	1.40042e-20
	insect	3.22542e-18	4.31227e-18	7.53769e-18	8.03266e-21
	pea	1.05696e-18	1.11111e-18	2.16807e-18	1.26354e-21
	MP	1.15921e-18	1.47413e-18	2.63334e-18	1.69454e-21
	soy	7.32131e-19	1.00875e-18	1.74088e-18	1.33529e-21
Czech Republic	beef	2.31193e-17	7.19896e-18	3.03183e-17	6.86411e-20
	insect	2.17688e-18	3.48812e-18	5.665e-18	1.42748e-20
	pea	8.72449e-19	1.21811e-18	2.09056e-18	2.52857e-21
	MP	9.33351e-19	1.38055e-18	2.3139e-18	2.37328e-21
	soy	4.54382e-19	7.97961e-19	1.25234e-18	2.15287e-21
France	beef	3.68134e-17	5.76844e-18	4.25818e-17	1.58485e-20
	insect	1.8714e-18	1.91527e-18	3.78667e-18	3.2353e-21
	pea	7.40705e-19	6.37948e-19	1.37865e-18	5.89846e-22
	MP	7.90874e-19	7.67364e-19	1.55824e-18	1.16357e-21
	soy	3.57755e-19	3.88691e-19	7.46446e-19	5.05235e-22
Germany	beef	2.09428e-17	4.4579e-18	2.54008e-17	3.10488e-20
	insect	2.31743e-18	2.87391e-18	5.19134e-18	1.08687e-20
	pea	8.45272e-19	8.24714e-19	1.66999e-18	2.13923e-21
	MP	9.23563e-19	9.77384e-19	1.90095e-18	3.22017e-21
	soy	4.2289e-19	5.23592e-19	9.46482e-19	1.56707e-21
Greece	beef	3.74404e-17	9.14375e-18	4.65841e-17	4.65244e-20
	insect	2.3937e-18	3.1907e-18	5.5844e-18	2.81563e-21
	pea	7.75486e-19	1.07084e-18	1.84632e-18	8.32341e-22
	MP	8.39385e-19	3.05171e-18	3.89109e-18	1.0134e-21
	soy	4.26509e-19	6.26057e-19	1.05257e-18	5.14853e-22
Italy	beef	3.71916e-17	8.69324e-18	4.58848e-17	3.47352e-20
	insect	2.8765e-18	3.55547e-18	6.43197e-18	4.71836e-21
	pea	1.09243e-18	1.01484e-18	2.10727e-18	1.4278e-21
	MP	1.16519e-18	1.23789e-18	2.40308e-18	1.37285e-21
	soy	7.2135e-19	7.38911e-19	1.46026e-18	9.78282e-22
Netherlands	beef	3.4758e-17	9.28267e-18	4.40406e-17	4.45247e-20
	insect	3.61313e-18	3.65329e-18	7.26642e-18	1.32673e-20
	pea	1.16925e-18	9.67211e-19	2.13646e-18	2.88058e-21
	MP	1.26046e-18	1.13697e-18	2.39743e-18	3.75424e-21
	soy	8.42556e-19	7.14137e-19	1.55669e-18	2.46572e-21
Poland	beef	1.2517e-17	6.3812e-18	1.88982e-17	3.2139e-19
	insect	1.77414e-18	2.63653e-18	4.41067e-18	8.9364e-20
	pea	7.56512e-19	8.98879e-19	1.65539e-18	2.13328e-20
	MP	8.47765e-19	1.08757e-18	1.93533e-18	6.34987e-20
	soy	3.48153e-19	5.73583e-19	9.21736e-19	1.54678e-20
Romania	beef	2.28074e-17	3.75326e-18	2.65607e-17	3.19608e-20
	insect	1.01171e-18	9.92314e-19	2.00402e-18	2.93163e-21
	pea	3.90559e-19	4.01582e-19	7.92141e-19	3.9657e-22
	MP	4.13388e-19	4.45219e-19	8.58607e-19	4.83957e-22
	soy	1.80987e-19	1.94706e-19	3.75692e-19	3.60339e-22
Spain	beef	4.15961e-17	5.77678e-18	4.73729e-17	2.22433e-20
	insect	1.90062e-18	2.12123e-18	4.02185e-18	2.63255e-21
	pea	9.1452e-19	7.9726e-19	1.71178e-18	7.96321e-22
	MP	9.27467e-19	8.33112e-19	1.76058e-18	1.10585e-21
	soy	4.3395e-19	4.44969e-19	8.7892e-19	5.18792e-22
Unit: PDF*yr per patty

## Sheet: S3-4 TerrBio_by_ImpCa
Land use footprint (Unit: km2 per patty)
	Belgium	Czech Republic	France	Germany	Greece	Italy	Netherlands	Poland	Romania	Spain	average	std	CV
insect	3.65e-07	3.81e-07	3e-07	2.6e-07	5.16e-07	3.93e-07	3.22e-07	3.79e-07	3.89e-07	5.36e-07	3.84e-07	8.19e-08	0.213
pea	2.55e-07	2.97e-07	2.21e-07	2.33e-07	2.59e-07	3.09e-07	2.71e-07	2.54e-07	2.99e-07	4.19e-07	2.82e-07	5.34e-08	0.189
MP	3.02e-07	4.21e-07	2.7e-07	2.8e-07	4.94e-07	5.35e-07	3.11e-07	3.34e-07	4.03e-07	5.36e-07	3.89e-07	9.9e-08	0.255
soy	1.89e-07	1.68e-07	1.52e-07	1.49e-07	1.61e-07	1.46e-07	1.6e-07	1.55e-07	1.42e-07	1.64e-07	1.58e-07	1.27e-08	0.0804
Land-driven biodiversity (Unit: PDF*yr per patty)
	Belgium	Czech Republic	France	Germany	Greece	Italy	Netherlands	Poland	Romania	Spain	average	std	CV
insect	8.32e-16	5.25e-16	8.23e-16	5.53e-16	2.28e-15	1.36e-15	8.31e-16	2.96e-16	4.45e-16	2.58e-15	1.05e-15	7.45e-16	0.708
pea	2.18e-15	1.88e-15	1.78e-15	1.91e-15	2.24e-15	2.21e-15	2.02e-15	1.72e-15	1.58e-15	3.29e-15	2.08e-15	4.54e-16	0.218
MP	1.61e-15	1.68e-15	1.64e-15	1.49e-15	3.33e-15	3.11e-15	1.81e-15	1.42e-15	1.41e-15	3.78e-15	2.13e-15	8.58e-16	0.403
soy	5.33e-16	2.18e-16	4.18e-16	3.89e-16	4.36e-16	4.57e-16	4.54e-16	1.91e-16	1.86e-16	6.1e-16	3.89e-16	1.38e-16	0.355
Climate-driven biodiversity (Unit: PDF*yr per patty)
	Belgium	Czech Republic	France	Germany	Greece	Italy	Netherlands	Poland	Romania	Spain	average	std	CV
insect	1.50834e-17	1.13443e-17	7.57658e-18	1.03936e-17	1.11716e-17	1.28687e-17	1.45461e-17	8.9107e-18	4.01098e-18	8.04634e-18	1.03952e-17	3.21333e-18	0.309116
pea	4.33741e-18	4.18365e-18	2.75789e-18	3.34211e-18	3.69348e-18	4.21597e-18	4.27581e-18	3.33212e-18	1.58468e-18	3.42436e-18	3.51475e-18	8.12182e-19	0.231078
MP	5.26837e-18	4.63017e-18	3.11764e-18	3.80511e-18	7.7832e-18	4.80753e-18	4.79862e-18	3.93417e-18	1.7177e-18	3.52226e-18	4.33848e-18	1.50734e-18	0.347435
soy	3.48309e-18	2.50684e-18	1.4934e-18	1.89453e-18	2.10565e-18	2.9215e-18	3.11585e-18	1.85894e-18	7.51745e-19	1.75836e-18	2.18899e-18	7.81596e-19	0.357058
Percentage of climate-driven biodiversity and land-driven biodiversity in Terrestrial biodiversity impact
		Belgium	Czech Republic	France	Germany	Greece	Italy	Netherlands	Poland	Romania	Spain
insect	climate-driven %	0.0178	0.0211	0.00913	0.0185	0.00487	0.00938	0.0172	0.0292	0.00893	0.00311
	land-driven %	0.982	0.979	0.991	0.982	0.995	0.991	0.983	0.971	0.991	0.997
pea	climate-driven %	0.00198	0.00222	0.00155	0.00174	0.00165	0.0019	0.00211	0.00194	0.001	0.00104
	land-driven %	0.998	0.998	0.998	0.998	0.998	0.998	0.998	0.998	0.999	0.999
MP	climate-driven %	0.00327	0.00276	0.00189	0.00254	0.00233	0.00155	0.00264	0.00276	0.00122	0.000931
	land-driven %	0.997	0.997	0.998	0.997	0.998	0.998	0.997	0.997	0.999	0.999
soy	climate-driven %	0.0065	0.0114	0.00356	0.00485	0.00481	0.00636	0.00681	0.00962	0.00402	0.00287
	land-driven %	0.994	0.989	0.996	0.995	0.995	0.994	0.993	0.99	0.996	0.997
beef	climate-driven %	0.0298	0.0369	0.0279	0.0313	0.00757	0.00846	0.022	0.0423	0.0281	0.00433
	land-driven %	0.97	0.963	0.972	0.969	0.992	0.992	0.978	0.958	0.972	0.996

## Sheet: S3-5 LU_by_ingr
		Belgium	Czech Republic	France	Germany	Greece	Italy	Netherlands	Poland	Romania	Spain	average	std	CV	%
pea	Coconut fat and oil	6.53606e-08	7.19925e-08	6.97398e-08	6.8909e-08	6.72469e-08	7.47591e-08	6.92164e-08	7.04036e-08	6.26879e-08	7.56266e-08	6.95942e-08	3.75815e-09	0.0540009	0.247011
	Pea protein	8.49877e-08	1.52437e-07	6.95892e-08	9.02943e-08	1.12826e-07	1.55638e-07	1.1393e-07	1.18053e-07	1.70068e-07	2.34641e-07	1.30246e-07	4.65438e-08	0.357352	0.462284
	Potato products	1.01083e-09	1.07376e-09	6.75855e-10	6.48665e-10	1.0156e-09	1.03705e-09	1.04913e-09	9.48931e-10	1.85263e-09	9.45784e-10	1.02582e-09	3.10476e-10	0.30266	0.00364096
	Rape oil	9.8318e-08	7.00628e-08	7.99542e-08	7.12091e-08	7.65271e-08	7.06641e-08	8.21695e-08	6.25293e-08	6.42399e-08	1.0577e-07	7.81444e-08	1.34119e-08	0.171629	0.277358
	others	5.71127e-09	1.05447e-09	1.06954e-09	1.55385e-09	1.36796e-09	7.24057e-09	4.53141e-09	1.7554e-09	6.03916e-10	2.45842e-09	2.73468e-09	2.16391e-09	0.791283	0.00970621
soy	Onions	4.16063e-09	3.63696e-09	2.86805e-09	2.64714e-09	3.16082e-09	3.7798e-09	3.80154e-09	3.22393e-09	5.35266e-09	2.64666e-09	3.52782e-09	7.80718e-10	0.221303	0.02226
	Rape oil	7.15606e-08	5.09951e-08	5.81945e-08	5.18294e-08	5.57001e-08	5.14327e-08	5.98069e-08	4.55119e-08	4.67569e-08	7.69846e-08	5.68773e-08	9.7618e-09	0.171629	0.358887
	Soy protein	1.00947e-07	1.05005e-07	8.34606e-08	8.79905e-08	8.78052e-08	7.28287e-08	8.47657e-08	9.61127e-08	8.05321e-08	7.10407e-08	8.70489e-08	1.05747e-08	0.12148	0.549265
	Wheat products	6.32378e-09	7.18519e-09	6.10193e-09	4.61123e-09	1.27462e-08	1.07767e-08	7.21299e-09	8.51537e-09	8.64939e-09	1.08164e-08	8.29391e-09	2.39105e-09	0.28829	0.0523333
	others	5.71127e-09	1.05447e-09	1.06954e-09	1.55385e-09	1.36796e-09	7.24057e-09	4.53141e-09	1.7554e-09	6.03916e-10	2.45842e-09	2.73468e-09	2.16391e-09	0.791283	0.0172554
insect	Egg products	1.71211e-09	1.48445e-09	9.06619e-10	1.06937e-09	9.57736e-10	1.84374e-09	1.34754e-09	1.28515e-09	1.74875e-09	1.12008e-09	1.34756e-09	3.22211e-10	0.239108	0.00350814
	Grain mix	1.9211e-07	2.30724e-07	1.5894e-07	1.27456e-07	3.53258e-07	2.2562e-07	1.74095e-07	2.46926e-07	2.2669e-07	3.75351e-07	2.31117e-07	7.53324e-08	0.325949	0.601676
	Onions	2.48178e-09	2.16943e-09	1.71077e-09	1.579e-09	1.88541e-09	2.25462e-09	2.26759e-09	1.92305e-09	3.19301e-09	1.57871e-09	2.10434e-09	4.65737e-10	0.221322	0.0054783
	Potato products	1.30381e-09	1.10654e-09	7.51205e-10	7.07875e-10	1.11028e-09	1.02429e-09	1.12997e-09	1.16545e-09	1.95951e-09	9.25119e-10	1.1184e-09	3.30754e-10	0.295737	0.00291158
	Rape oil	4.67095e-08	3.28963e-08	3.74483e-08	3.32766e-08	3.47131e-08	3.1946e-08	3.83038e-08	2.89767e-08	2.93767e-08	4.81809e-08	3.61828e-08	6.31247e-09	0.174461	0.094196
	Soy protein	4.25725e-08	4.32301e-08	3.47404e-08	3.6432e-08	3.88286e-08	3.16302e-08	3.54613e-08	4.02171e-08	3.41555e-08	3.06654e-08	3.67933e-08	4.09856e-09	0.111394	0.0957855
	Vegetables(carrots)	6.33715e-08	6.04927e-08	5.71713e-08	5.18164e-08	5.0518e-08	7.7879e-08	5.71428e-08	4.25154e-08	6.59895e-08	5.95642e-08	5.86461e-08	9.09812e-09	0.155136	0.152676
	others	1.5096e-08	8.56802e-09	8.69627e-09	8.08169e-09	3.47497e-08	2.08554e-08	1.23013e-08	1.59222e-08	2.54924e-08	1.83634e-08	1.68126e-08	8.06223e-09	0.479534	0.043769
MP	Coconut fat and oil	5.16005e-08	5.68362e-08	5.50577e-08	5.44019e-08	5.30897e-08	5.90204e-08	5.46445e-08	5.55818e-08	4.94905e-08	5.97052e-08	5.49428e-08	2.96696e-09	0.0540009	0.141341
	Palm oil	1.89986e-10	2.29284e-10	2.42304e-10	2.74143e-10	2.39555e-10	2.3027e-10	2.27461e-10	2.44557e-10	1.52553e-10	2.56008e-10	2.28612e-10	3.26597e-11	0.142861	0.000588107
	Pea protein	6.54406e-08	1.17377e-07	5.35837e-08	6.95266e-08	8.68764e-08	1.19841e-07	8.7726e-08	9.0901e-08	1.30953e-07	1.80673e-07	1.0029e-07	3.58388e-08	0.357352	0.257996
	Potato products	6.5407e-10	6.94788e-10	4.37318e-10	4.19724e-10	6.5715e-10	6.71031e-10	6.7885e-10	6.14014e-10	1.19876e-09	6.11978e-10	6.63768e-10	2.00896e-10	0.30266	0.00170755
	Molass	1.17263e-07	1.81501e-07	9.74982e-08	1.06257e-07	2.447e-07	2.56661e-07	9.7337e-08	1.1439e-07	1.44121e-07	1.86599e-07	1.54633e-07	5.68151e-08	0.36742	0.397794
	Sunflower oil	1.82899e-08	1.48984e-08	2.07675e-08	1.63295e-08	2.05984e-08	1.88448e-08	1.75499e-08	1.30205e-08	1.8269e-08	3.27048e-08	1.91273e-08	5.06176e-09	0.264636	0.0492051
	Wheat products	4.27785e-08	4.86057e-08	4.12778e-08	3.11936e-08	8.62242e-08	7.29014e-08	4.87937e-08	5.7604e-08	5.85106e-08	7.31695e-08	5.61059e-08	1.61748e-08	0.28829	0.144333
	others	5.71127e-09	1.05447e-09	1.06954e-09	1.55385e-09	1.36796e-09	7.24057e-09	4.53141e-09	1.7554e-09	6.03916e-10	2.45842e-09	2.73468e-09	2.16391e-09	0.791283	0.00703499
Unit: km2 per patty

## Sheet: S3-6 LDB_by_ingr
		Belgium	Czech Republic	France	Germany	Greece	Italy	Netherlands	Poland	Romania	Spain	average	std	CV	%
pea	Coconut fat and oil	1.50669e-15	1.65735e-15	1.37664e-15	1.59708e-15	1.46424e-15	1.7532e-15	1.58993e-15	1.60513e-15	1.34713e-15	1.7734e-15	1.56708e-15	1.36783e-16	0.0872853	0.753037
	Pea protein	2.19771e-16	1.49527e-16	1.88698e-16	8.43705e-17	5.15803e-16	2.23893e-16	1.55775e-16	6.34808e-17	1.65123e-16	1.09887e-15	2.86531e-16	2.95234e-16	1.03038	0.137688
	Potato products	2.30928e-18	1.33236e-18	1.79721e-18	1.04307e-18	4.32657e-18	3.63511e-18	3.23078e-18	6.94877e-19	1.85936e-18	4.20908e-18	2.44377e-18	1.25433e-18	0.513276	0.00117432
	Rape oil	4.36554e-16	6.81535e-17	2.1155e-16	2.26988e-16	2.47513e-16	2.01863e-16	2.53757e-16	4.50216e-17	6.27049e-17	4.04824e-16	2.15893e-16	1.27141e-16	0.588909	0.103744
	others	1.91231e-17	1.97362e-18	3.44714e-18	4.12484e-18	4.00569e-18	2.93291e-17	1.64245e-17	2.54141e-18	7.53493e-19	8.92956e-18	9.06525e-18	8.99704e-18	0.992476	0.00435617
soy	Onions	1.25388e-17	7.58581e-18	9.88364e-18	6.49462e-18	1.6816e-17	1.70673e-17	1.27628e-17	2.83028e-18	6.04643e-18	1.44216e-17	1.06447e-17	4.59393e-18	0.431569	0.027347
	Rape oil	3.17745e-16	4.96054e-17	1.53976e-16	1.65213e-16	1.80152e-16	1.46925e-16	1.84697e-16	3.27689e-17	4.56397e-17	2.9465e-16	1.57137e-16	9.25395e-17	0.588909	0.403696
	Soy protein	1.71179e-16	1.51202e-16	2.35389e-16	2.07483e-16	1.90652e-16	2.33421e-16	2.26966e-16	1.48088e-16	1.24823e-16	2.5046e-16	1.93966e-16	4.12073e-17	0.212446	0.498313
	Wheat products	1.2013e-17	7.4433e-18	1.56741e-17	5.7962e-18	4.43256e-17	2.995e-17	1.33096e-17	5.19078e-18	8.94738e-18	4.16764e-17	1.84326e-17	1.4015e-17	0.760335	0.0473547
	others	1.91231e-17	1.97362e-18	3.44714e-18	4.12484e-18	4.00569e-18	2.93291e-17	1.64245e-17	2.54141e-18	7.53493e-19	8.92956e-18	9.06525e-18	8.99704e-18	0.992476	0.0232892
insect	Egg products	5.42577e-18	2.33156e-18	2.90003e-18	2.6833e-18	1.80987e-18	7.13007e-18	4.31572e-18	1.4597e-18	1.91049e-18	4.03459e-18	3.40011e-18	1.72266e-18	0.506648	0.00323029
	Grain mix	2.61918e-16	2.21444e-16	3.77005e-16	1.33838e-16	1.66157e-15	7.16005e-16	2.54085e-16	1.3416e-16	2.38136e-16	1.87043e-15	5.86859e-16	6.11957e-16	1.04277	0.557549
	Onions	7.47928e-18	4.52489e-18	5.8955e-18	3.87399e-18	1.00306e-17	1.01805e-17	7.6129e-18	1.68825e-18	3.60701e-18	8.60237e-18	6.34953e-18	2.7402e-18	0.43156	0.0060324
	Potato products	2.99352e-18	1.33773e-18	1.98986e-18	1.1709e-18	4.6867e-18	3.4972e-18	3.39371e-18	8.65222e-19	1.97015e-18	4.09181e-18	2.59968e-18	1.24835e-18	0.480193	0.00246984
	Rape oil	2.07157e-16	3.23307e-17	9.92941e-17	1.0596e-16	1.12302e-16	9.11346e-17	1.18771e-16	2.11056e-17	2.8812e-17	1.83705e-16	1.00057e-16	5.91428e-17	0.591089	0.0950599
	Soy protein	7.60636e-17	6.52207e-17	9.96517e-17	8.73148e-17	8.60614e-17	1.01624e-16	9.63705e-17	6.53361e-17	5.69517e-17	1.07703e-16	8.42298e-17	1.66757e-17	0.197978	0.080023
	Vegetables(carrots)	2.34787e-16	1.87783e-16	2.12249e-16	2.02949e-16	2.67675e-16	3.6033e-16	3.14905e-16	5.89601e-17	8.45756e-17	3.27949e-16	2.25216e-16	9.3933e-17	0.417079	0.213968
	others	3.60772e-17	1.03475e-17	2.3663e-17	1.48089e-17	1.36571e-16	6.93161e-17	3.14768e-17	1.27973e-17	2.91669e-17	7.43605e-17	4.38585e-17	3.73407e-17	0.85139	0.041668
MP	Coconut fat and oil	1.18949e-15	1.30843e-15	1.08682e-15	1.26085e-15	1.15598e-15	1.3841e-15	1.25521e-15	1.26721e-15	1.06353e-15	1.40005e-15	1.23717e-15	1.07987e-16	0.0872853	0.58117
	Palm oil	8.52896e-19	1.03217e-18	1.09562e-18	1.23202e-18	1.07234e-18	1.02968e-18	1.02915e-18	1.09902e-18	6.81716e-19	1.14895e-18	1.02736e-18	1.47793e-19	0.143858	0.00048261
	Pea protein	1.69224e-16	1.15135e-16	1.45297e-16	6.49653e-17	3.97168e-16	1.72397e-16	1.19947e-16	4.88802e-17	1.27145e-16	8.46126e-16	2.20629e-16	2.2733e-16	1.03038	0.103642
	Potato products	1.49424e-18	8.62118e-19	1.1629e-18	6.74929e-19	2.79954e-18	2.35213e-18	2.0905e-18	4.49627e-19	1.20311e-18	2.72352e-18	1.58126e-18	8.11624e-19	0.513276	0.000742812
	Molass	1.14788e-16	1.80431e-16	2.53875e-16	1.01158e-16	1.41549e-15	1.28877e-15	3.07725e-16	5.32971e-17	1.39302e-16	1.11491e-15	4.96975e-16	5.17212e-16	1.04072	0.233458
	Sunflower oil	2.91969e-17	1.72528e-17	4.7123e-17	2.24156e-17	5.74195e-17	2.55947e-17	2.11564e-17	1.316e-17	1.7656e-17	1.25186e-16	3.76161e-17	3.20619e-17	0.852344	0.0176705
	Wheat products	8.12643e-17	5.03518e-17	1.06031e-16	3.92096e-17	2.9985e-16	2.02603e-16	9.00357e-17	3.51141e-17	6.05264e-17	2.81929e-16	1.24691e-16	9.48073e-17	0.760335	0.0585749
	others	1.91231e-17	1.97362e-18	3.44714e-18	4.12484e-18	4.00569e-18	2.93291e-17	1.64245e-17	2.54141e-18	7.53493e-19	8.92957e-18	9.06525e-18	8.99704e-18	0.992476	0.00425848
Unit: PDF* yr per patty

## Sheet: S3-7 CDB_by_ingr
		Belgium	Czech Republic	France	Germany	Greece	Italy	Netherlands	Poland	Romania	Spain
pea	Belgium	0	0	0	0	0	0	0	0	0	0
	Philippines	5.46512e-19	6.41646e-19	4.99951e-19	6.14299e-19	3.97282e-19	7.66932e-19	5.6646e-19	5.58077e-19	1.9742e-19	7.90922e-19
	France	3.22224e-19	0	0	0	0	0	0	0	0	0
	Czech Republic	0	0	0	0	0	0	0	0	0	0
	Poland	0	1.12156e-19	0	0	0	0	0	0	0	0
	Indonesia	0	0	1.40914e-19	9.81897e-20	3.04115e-19	0	1.92114e-19	1.71505e-19	4.49924e-19	0
	Germany	0	0	0	0	0	0	0	0	0	0
	Greece	0	0	0	0	0	0	0	0	0	0
	Italy	0	0	0	0	0	0	0	0	0	0
	Russian Federation	0	0	0	0	0	2.21489e-19	0	0	0	6.29528e-20
	Netherlands	0	0	0	0	0	0	0	0	0	0
	Romania	0	0	0	0	0	0	0	0	0	0
	Spain	0	0	0	0	0	0	0	0	0	0
	others	6.24459e-19	2.61487e-19	2.89152e-19	4.19593e-19	4.60837e-19	5.45353e-19	8.56558e-19	2.26345e-19	1.88195e-19	3.32181e-19
	Local	1.31119e-18	1.72323e-18	9.93074e-19	1.1417e-18	1.29231e-18	1.12821e-18	1.25309e-18	1.43659e-18	4.15894e-19	1.04797e-18
soy	Belgium	0	0	0	0	0	0	0	0	0	0
	Philippines	5.46512e-19	6.41646e-19	4.99951e-19	6.14299e-19	3.97282e-19	7.66932e-19	5.6646e-19	5.58077e-19	1.9742e-19	7.90922e-19
	France	3.22224e-19	0	0	0	0	0	0	0	0	0
	Czech Republic	0	0	0	0	0	0	0	0	0	0
	Poland	0	1.12156e-19	0	0	0	0	0	0	0	0
	Indonesia	0	0	1.40914e-19	9.81897e-20	3.04115e-19	0	1.92114e-19	1.71505e-19	4.49924e-19	0
	Germany	0	0	0	0	0	0	0	0	0	0
	Greece	0	0	0	0	0	0	0	0	0	0
	Italy	0	0	0	0	0	0	0	0	0	0
	Russian Federation	0	0	0	0	0	2.21489e-19	0	0	0	6.29528e-20
	Netherlands	0	0	0	0	0	0	0	0	0	0
	Romania	0	0	0	0	0	0	0	0	0	0
	Spain	0	0	0	0	0	0	0	0	0	0
	others	6.24459e-19	2.61487e-19	2.89152e-19	4.19593e-19	4.60837e-19	5.45353e-19	8.56558e-19	2.26345e-19	1.88195e-19	3.32181e-19
	Local	1.31119e-18	1.72323e-18	9.93074e-19	1.1417e-18	1.29231e-18	1.12821e-18	1.25309e-18	1.43659e-18	4.15894e-19	1.04797e-18
insect	Belgium	0	0	0	0	0	0	0	0	0	0
	Philippines	5.46512e-19	6.41646e-19	4.99951e-19	6.14299e-19	3.97282e-19	7.66932e-19	5.6646e-19	5.58077e-19	1.9742e-19	7.90922e-19
	France	3.22224e-19	0	0	0	0	0	0	0	0	0
	Czech Republic	0	0	0	0	0	0	0	0	0	0
	Poland	0	1.12156e-19	0	0	0	0	0	0	0	0
	Indonesia	0	0	1.40914e-19	9.81897e-20	3.04115e-19	0	1.92114e-19	1.71505e-19	4.49924e-19	0
	Germany	0	0	0	0	0	0	0	0	0	0
	Greece	0	0	0	0	0	0	0	0	0	0
	Italy	0	0	0	0	0	0	0	0	0	0
	Russian Federation	0	0	0	0	0	2.21489e-19	0	0	0	6.29528e-20
	Netherlands	0	0	0	0	0	0	0	0	0	0
	Romania	0	0	0	0	0	0	0	0	0	0
	Spain	0	0	0	0	0	0	0	0	0	0
	others	6.24459e-19	2.61487e-19	2.89152e-19	4.19593e-19	4.60837e-19	5.45353e-19	8.56558e-19	2.26345e-19	1.88195e-19	3.32181e-19
	Local	1.31119e-18	1.72323e-18	9.93074e-19	1.1417e-18	1.29231e-18	1.12821e-18	1.25309e-18	1.43659e-18	4.15894e-19	1.04797e-18
MP	Belgium	0	0	0	0	0	0	0	0	0	0
	Philippines	5.46512e-19	6.41646e-19	4.99951e-19	6.14299e-19	3.97282e-19	7.66932e-19	5.6646e-19	5.58077e-19	1.9742e-19	7.90922e-19
	France	3.22224e-19	0	0	0	0	0	0	0	0	0
	Czech Republic	0	0	0	0	0	0	0	0	0	0
	Poland	0	1.12156e-19	0	0	0	0	0	0	0	0
	Indonesia	0	0	1.40914e-19	9.81897e-20	3.04115e-19	0	1.92114e-19	1.71505e-19	4.49924e-19	0
	Germany	0	0	0	0	0	0	0	0	0	0
	Greece	0	0	0	0	0	0	0	0	0	0
	Italy	0	0	0	0	0	0	0	0	0	0
	Russian Federation	0	0	0	0	0	2.21489e-19	0	0	0	6.29528e-20
	Netherlands	0	0	0	0	0	0	0	0	0	0
	Romania	0	0	0	0	0	0	0	0	0	0
	Spain	0	0	0	0	0	0	0	0	0	0
	others	6.24459e-19	2.61487e-19	2.89152e-19	4.19593e-19	4.60837e-19	5.45353e-19	8.56558e-19	2.26345e-19	1.88195e-19	3.32181e-19
	Local	1.31119e-18	1.72323e-18	9.93074e-19	1.1417e-18	1.29231e-18	1.12821e-18	1.25309e-18	1.43659e-18	4.15894e-19	1.04797e-18
Unit: PDF*yr per patty

## Sheet: S3-8 LU_by_region
		Belgium	Czech Republic	France	Germany	Greece	Italy	Netherlands	Poland	Romania	Spain
pea	France	0.198283	0	0	0	0	0	0	0	0	0
	Philippines	0.190841	0.190622	0.200005	0.23201	0.139947	0.217271	0.185603	0.195266	0.061339	0.164036
	Australia	0.188103	0	0	0.0848021	0	0	0.0942276	0	0	0
	Poland	0	0.0344162	0	0	0	0	0	0	0	0
	Canada	0	0	0.0549126	0	0	0	0	0	0	0
	Indonesia	0	0	0	0	0.084656	0	0	0	0.107831	0
	Russian Federation	0	0	0	0	0	0.292472	0	0	0	0.0734866
	Ukraine	0	0	0	0	0	0	0.10708	0.119743	0	0
	others	0.422773	0.119915	0.198238	0.401799	0.345088	0.351786	0.61309	0.173389	0.0884908	0.231945
	Local	0	0.655046	0.546844	0.281389	0.430309	0.138471	0	0.511602	0.742339	0.530532
soy	Canada	0.300341	0	0.10749	0	0	0.112538	0	0	0	0
	Australia	0.166999	0	0	0.0963715	0	0	0.102982	0	0	0
	US	0.141079	0.113478	0.152814	0.401046	0	0.0971379	0.327867	0.232406	0.0670598	0.199814
	Slovakia	0	0.0460856	0	0	0	0	0	0	0	0
	Ukraine	0	0	0	0	0.213795	0	0	0.220544	0	0
	Paraguay	0	0	0	0	0.122798	0	0	0	0	0
	Brazil	0	0	0	0	0	0	0.0818341	0	0.0405529	0.121816
	others	0.391581	0.198655	0.200175	0.363242	0.463693	0.509585	0.487317	0.193145	0.137971	0.396946
	Local	0	0.641781	0.53952	0.139341	0.199714	0.280739	0	0.353906	0.754416	0.281424
insect	France	0.164163	0	0	0	0	0	0.12152	0	0	0
	Russian Federation	0.0845227	0	0	0	0	0	0	0	0	0
	Poland	0	0.0801364	0	0.0672188	0	0	0	0	0	0
	Slovakia	0	0.0272494	0	0	0	0	0	0	0	0
	Spain	0	0	0.0375466	0	0	0	0	0	0	0
	Belarus	0	0	0.0347863	0	0	0	0	0	0	0
	Germany	0	0	0	0	0	0.0483573	0.129222	0	0	0
	US	0	0	0	0.0976043	0	0	0	0.0400846	0	0.0301839
	Bulgaria	0	0	0	0	0.0536436	0	0	0	0.0145632	0
	Ukraine	0	0	0	0	0.0439312	0	0	0.0450282	0	0.0290104
	Canada	0	0	0	0	0	0.0423267	0	0	0	0
	Hungary	0	0	0	0	0	0	0	0	0.0439835	0
	others	0.577628	0.187276	0.211143	0.395018	0.212543	0.387956	0.57753	0.113892	0.119683	0.210296
	Local	0.173687	0.705338	0.716524	0.440159	0.689883	0.52136	0.171728	0.800995	0.821771	0.73051
MP	France	0.187	0	0	0	0	0	0.0885679	0	0	0
	Philippines	0.128869	0.107277	0.131319	0.154691	0.0581946	0.100629	0.129384	0.118044	0.0361113	0.103252
	Slovakia	0	0.0236044	0	0	0	0	0	0	0	0
	Indonesia	0	0	0.0330564	0	0	0	0	0	0.0700782	0
	Ukraine	0	0	0	0.0403197	0	0	0	0.0759254	0	0.044237
	Bulgaria	0	0	0	0	0.0462326	0	0	0	0	0
	Russian Federation	0	0	0	0	0	0.133796	0	0	0	0
	others	0.248756	0.0710613	0.105194	0.227923	0.161957	0.187982	0.426785	0.114808	0.0772517	0.133461
	Local	0.435375	0.798057	0.730431	0.577066	0.733616	0.577593	0.355263	0.691222	0.816559	0.71905
beef	France	0.09288	0	0	0	0.0891984	0.0909635	0	0	0	0.030159
	Ireland	0.0636482	0.0540593	0.0513617	0	0	0	0.0717049	0	0	0.0140036
	India	0.0600999	0.0708422	0.0324871	0.0508176	0	0.0227634	0	0	0.0529904	0
	Poland	0	0.126772	0	0.0564085	0	0	0	0	0.0526505	0
	Spain	0	0	0.050662	0	0.0652132	0.0295496	0	0	0	0
	Italy	0	0	0	0.0479924	0.0764512	0	0	0.0227002	0.0800402	0
	Germany	0	0	0	0	0	0	0.102869	0	0	0
	Australia	0	0	0	0	0	0	0.0621896	0	0	0
	Lithuania	0	0	0	0	0	0	0	0.0483078	0	0
	Latvia	0	0	0	0	0	0	0	0.0252308	0	0
	Portugal	0	0	0	0	0	0	0	0	0	0.0241227
	others	0.518437	0.32201	0.213554	0.447509	0.26024	0.234016	0.62541	0.186794	0.177973	0.112966
	Local	0.264935	0.426316	0.651935	0.397272	0.508897	0.622708	0.137827	0.716967	0.636345	0.818748

## Sheet: S3-9 LDB_by_region
		Belgium	Czech Republic	France	Germany	Greece	Italy	Netherlands	Poland	Romania	Spain
pea	Philippines	0.483635	0.653203	0.540071	0.614502	0.348909	0.661407	0.541942	0.623762	0.250596	0.456899
	Australia	0.201446	0	0	0.0945777	0	0	0.117284	0	0	0
	Indonesia	0.105302	0	0.120299	0	0.208864	0	0.14419	0.153769	0.435894	0
	Vanuatu	0	0.0908822	0	0.086088	0	0.0907415	0	0.0931097	0	0.0613801
	others	0.209618	0.154123	0.160736	0.204833	0.158218	0.15943	0.196584	0.129359	0.178235	0.0764153
	Local	0	0.101792	0.178895	0	0.284009	0.0884218	0	0	0.135276	0.405306
soy	Australia	0.533059	0	0	0.332812	0.0761588	0.190879	0.32084	0	0	0
	US	0.0962766	0.168165	0.10606	0.292694	0	0	0.221218	0.364395	0.0998832	0.101589
	Brazil	0.0874796	0.0854222	0.186207	0.119207	0	0.0775545	0.225361	0.138242	0.247656	0.252904
	Paraguay	0	0	0	0	0.194736	0	0	0	0	0
	others	0.283185	0.260565	0.202469	0.255287	0.318256	0.283719	0.23258	0.35097	0.0851242	0.230787
	Local	0	0.485847	0.505264	0	0.410849	0.447848	0	0.146393	0.567337	0.41472
insect	Australia	0.242448	0	0	0.155064	0	0.0734543	0.12509	0	0	0.0156992
	France	0.18888	0	0	0	0	0.0289594	0.123266	0	0	0
	Spain	0	0.1025	0.0765801	0.115049	0	0	0	0.0439788	0	0
	Italy	0	0.0638444	0	0	0	0	0	0	0	0
	Brazil	0	0	0.0451762	0	0	0	0	0	0.0531738	0.0296055
	Bulgaria	0	0	0	0	0.0189766	0	0	0	0	0
	Paraguay	0	0	0	0	0.0157244	0	0	0	0	0
	US	0	0	0	0	0	0	0	0.095465	0	0
	Hungary	0	0	0	0	0	0	0	0	0.0485311	0
	others	0.422892	0.325157	0.191219	0.50225	0.0761954	0.172935	0.529063	0.32948	0.20131	0.0666766
	Local	0.145779	0.508499	0.687025	0.227637	0.889104	0.724651	0.222581	0.531076	0.696985	0.888019
MP	Philippines	0.533322	0.582093	0.466779	0.628247	0.185562	0.378066	0.485905	0.600988	0.223568	0.315407
	Indonesia	0.113574	0	0.101695	0	0.108651	0	0.126444	0.144964	0.380427	0
	France	0.0918601	0	0	0	0	0	0	0	0	0
	Vanuatu	0	0.0811872	0	0.0882298	0	0.051996	0	0.0899309	0	0.0424756
	others	0.261244	0.143884	0.121727	0.182524	0.077931	0.0801663	0.200136	0.164117	0.168966	0.0369617
	Local	0	0.192836	0.309799	0.101	0.627856	0.489771	0.187515	0	0.227039	0.605156
beef	Australia	0.138354	0	0	0.0886056	0	0	0.137694	0	0	0
	France	0.108834	0	0	0	0	0.0608642	0	0	0	0.0150759
	India	0	0.140789	0	0	0	0	0	0	0.103573	0
	Spain	0	0.0861805	0.110122	0	0.0926026	0.0442249	0.125358	0	0	0
	Brazil	0	0	0.0442293	0	0	0	0	0	0	0
	Italy	0	0	0	0.112779	0.0874065	0	0	0.11716	0.232723	0
	Argentina	0	0	0	0	0	0	0	0.0618379	0	0
	Portugal	0	0	0	0	0	0	0	0	0	0.0254891
	others	0.612831	0.509928	0.210402	0.601282	0.191812	0.146758	0.561023	0.390669	0.248141	0.0545574
	Local	0.139982	0.263103	0.635246	0.197333	0.628179	0.748153	0.175925	0.430333	0.415563	0.904878

[truncated: 5 more sheets: S3-10 CDB_by_region, S3-11 Reduction_Beef2NB, S3-12 Land use intensity, S3-13 KeyIngr_TerrBio_soy, S3-14 LDB_LU_by_SysBoundary]
